# Supplementary material for: Guidongnins I–J: Two New 6,7-seco-7,20-Olide-ent-kaurene Diterpenes with Unusual Structures from Isodon rubescens
Source: MDPI journal article supplement (doi:10.3390/ijms241713451), 2023-08-30
Supplement: s1 [file s1]

## Supporting Information

# Guidongnins I-J, two new 6,7-*seco*-7,20-olide-*ent*-kaurene diterpenes with unusual structures from *Isodon rubescens*

Juan Zou<sup>a†</sup>, Jiang-Hai Ye<sup>a†</sup>, Chen-Liang Zhao<sup>ab</sup>, Jing-Jie Zhang<sup>a</sup>, Ya-Hua Liu<sup>a</sup>, Lu-Tai Pan<sup>a</sup>, Kang He<sup>a\*</sup> and Hong-Jie Zhang<sup>b,\*</sup>

<sup>a</sup> School of Pharmacy, Guizhou University of Traditional Chinese Medicine, 4 Dongqing road, Guiyang 550025, China

<sup>b</sup> School of Chinese Medicine, Hong Kong Baptist University, 7 Baptist University Road, Hong Kong SAR 999077, China.

---

\* Corresponding author. Kang He: Tel: +86-13608529029; Fax: +86-0851- 88308058; E-mail: zoujuan466@gzy.edu.cn. Hong-Jie Zhang: Tel: +852-34112956; Fax: +852-34112461; E-mail: zhanghj@hkbu.edu.hk.

†Juan Zou and Jiang-Hai Ye contributed equally to this work.

## Table of Contents

|                                                                                           |    |
|-------------------------------------------------------------------------------------------|----|
| General Experimental Procedures .....                                                     | 3  |
| Figure S1. The IR (KBr disc) spectrum of 1 .....                                          | 4  |
| Figure S2. The HR-ESI-MS spectrum of 1 .....                                              | 5  |
| Figure S4. $^{13}\text{C}$ NMR spectrum of 1 in $\text{CD}_3\text{OD}$ (150 MHz) .....    | 8  |
| Figure S5. DEPT spectrum of 1 in $\text{CD}_3\text{OD}$ .....                             | 9  |
| Figure S6. HSQC spectrum of 1 in $\text{CD}_3\text{OD}$ .....                             | 10 |
| Figure S7. HMBC spectrum of 1 in $\text{CD}_3\text{OD}$ .....                             | 11 |
| Figure S8. $^1\text{H}$ - $^1\text{H}$ COSY spectrum of 1 in $\text{CD}_3\text{OD}$ ..... | 12 |
| Figure S9. NOESY spectrum of 1 in $\text{CD}_3\text{OD}$ .....                            | 13 |
| Figure S10. The IR (KBr disc) spectrum of 2 .....                                         | 13 |
| Figure S11. The HR-ESI-MS spectrum of 2 .....                                             | 14 |
| Figure S12. $^1\text{H}$ NMR spectrum of 2 in $\text{CDCl}_3$ (600 MHz) .....             | 15 |
| Figure S13. $^{13}\text{C}$ NMR spectrum of 2 in $\text{CDCl}_3$ (150 MHz) .....          | 16 |
| Figure S14. DEPT spectrum of 2 in $\text{CDCl}_3$ .....                                   | 17 |
| Figure S15. HSQC spectrum of 2 in $\text{CDCl}_3$ .....                                   | 18 |
| Figure S16. HMBC spectrum of 2 in $\text{CDCl}_3$ .....                                   | 19 |
| Figure S17. $^1\text{H}$ - $^1\text{H}$ COSY spectrum of 2 in $\text{CDCl}_3$ .....       | 20 |
| Figure S18. NOESY spectrum of 2 in $\text{CDCl}_3$ .....                                  | 21 |
| Crystal Structure Report for Compound 1 .....                                             | 22 |
| Crystal Structure Report for Compound 2 .....                                             | 47 |

## General Experimental Procedures

An XRC-1 micro melting point apparatus (Sichuan Weitai, Chengdu, China) was used for the measurement of compounds' melting points. Optical rotations were determined on a Jasco P-1010 polarimeter (Perkin-Elmer, Waltham, United States). The IR spectra was recorded on a VECTOR22 infrared spectrometer (Bruker, Karlsruhe, Germany) using KBr pellets method. A Bruker Avance spectrometer (600 MHz, Bruker, Karlsruhe, Germany) was used for recording the NMR spectra. The HR-ESI-MS data was obtained on a Bruker Q-TOF mass spectrometer (Bruker, Karlsruhe, Germany). X-ray data were collected on a Bruker APEX-II CCD instrument equipped with Cu K $\alpha$  radiation for 1 (Bruker, Rheinstetten, Germany) and Bruker APEX-II instrument equipped with Mo K $\alpha$  radiation for 2 (Bruker, Rheinstetten, Germany). Silica gel (200-300 mesh; Qingdao Haiyang Chemical, Qingdao, China) was used for column chromatography, while silica gel GF254 (0.2 mm, Qingdao Haiyang Chemical Inc., Qingdao, China) was used for analytical TLC. Prior to use, all solvents were distilled.

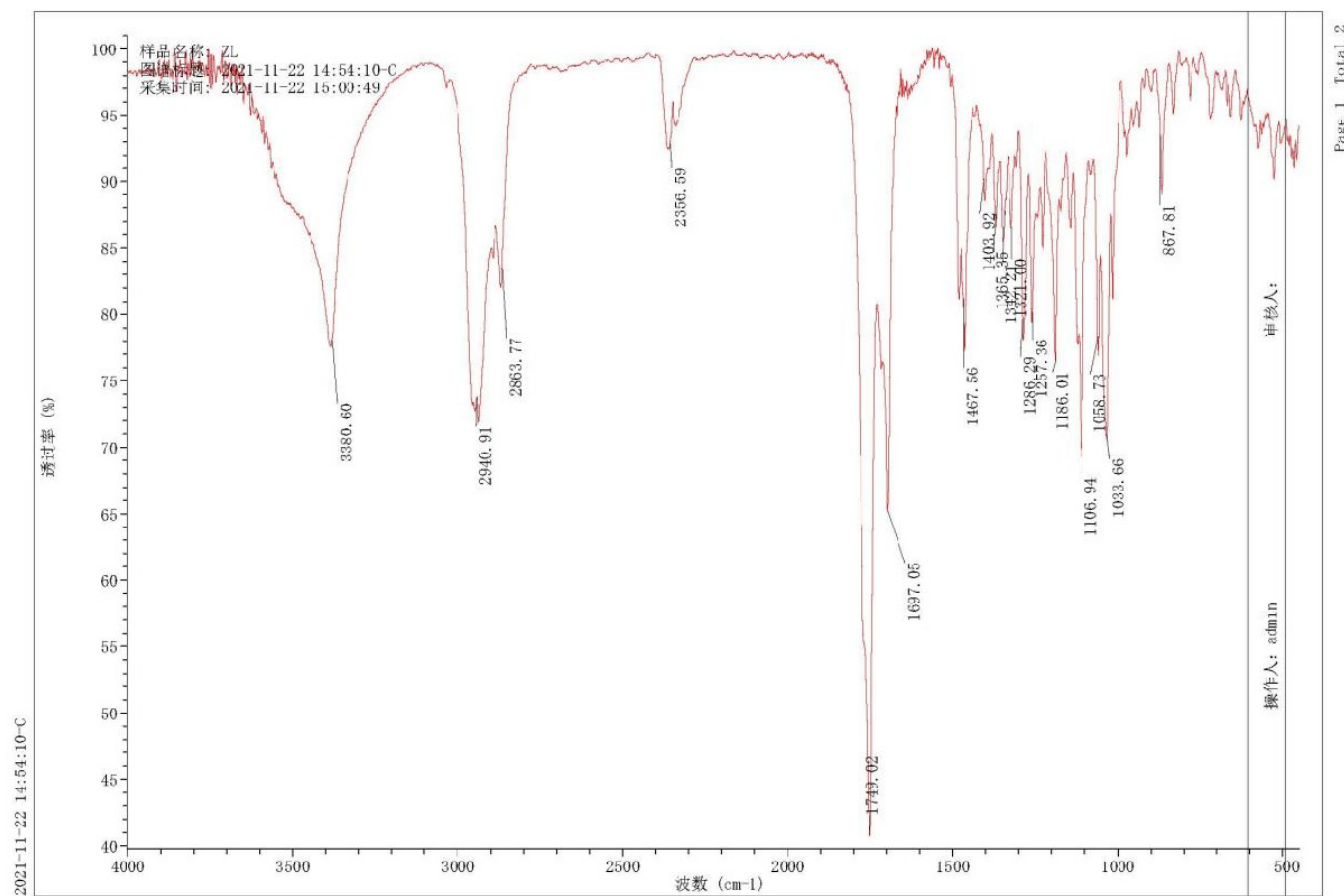

Figure S1. The IR (KBr disc) spectrum of **1**.

MGG-4 #43 RT: 0.19 AV: 1 NL: 2.40E9  
T: FTMS + p ESI Full ms [100.0000-1500.0000]

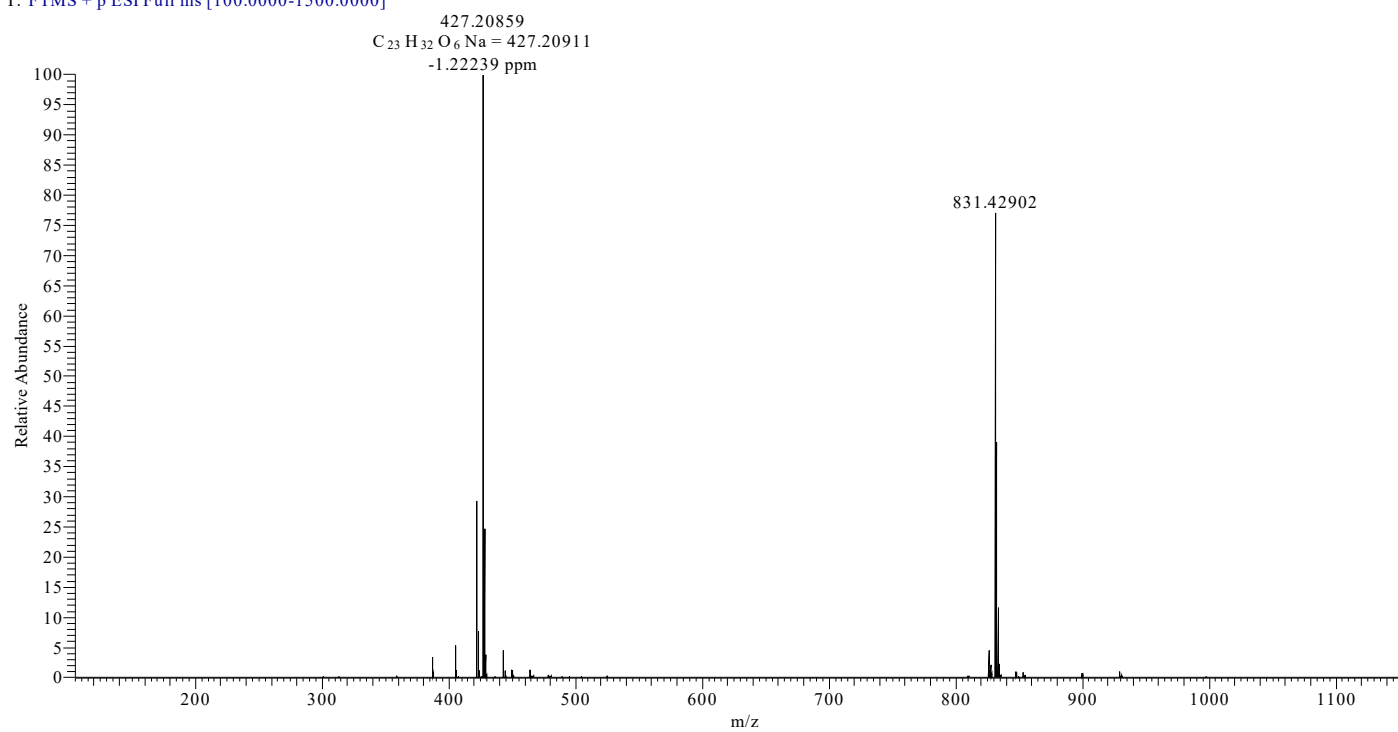

Figure S2. The HR-ESI-MS spectrum of **1**.

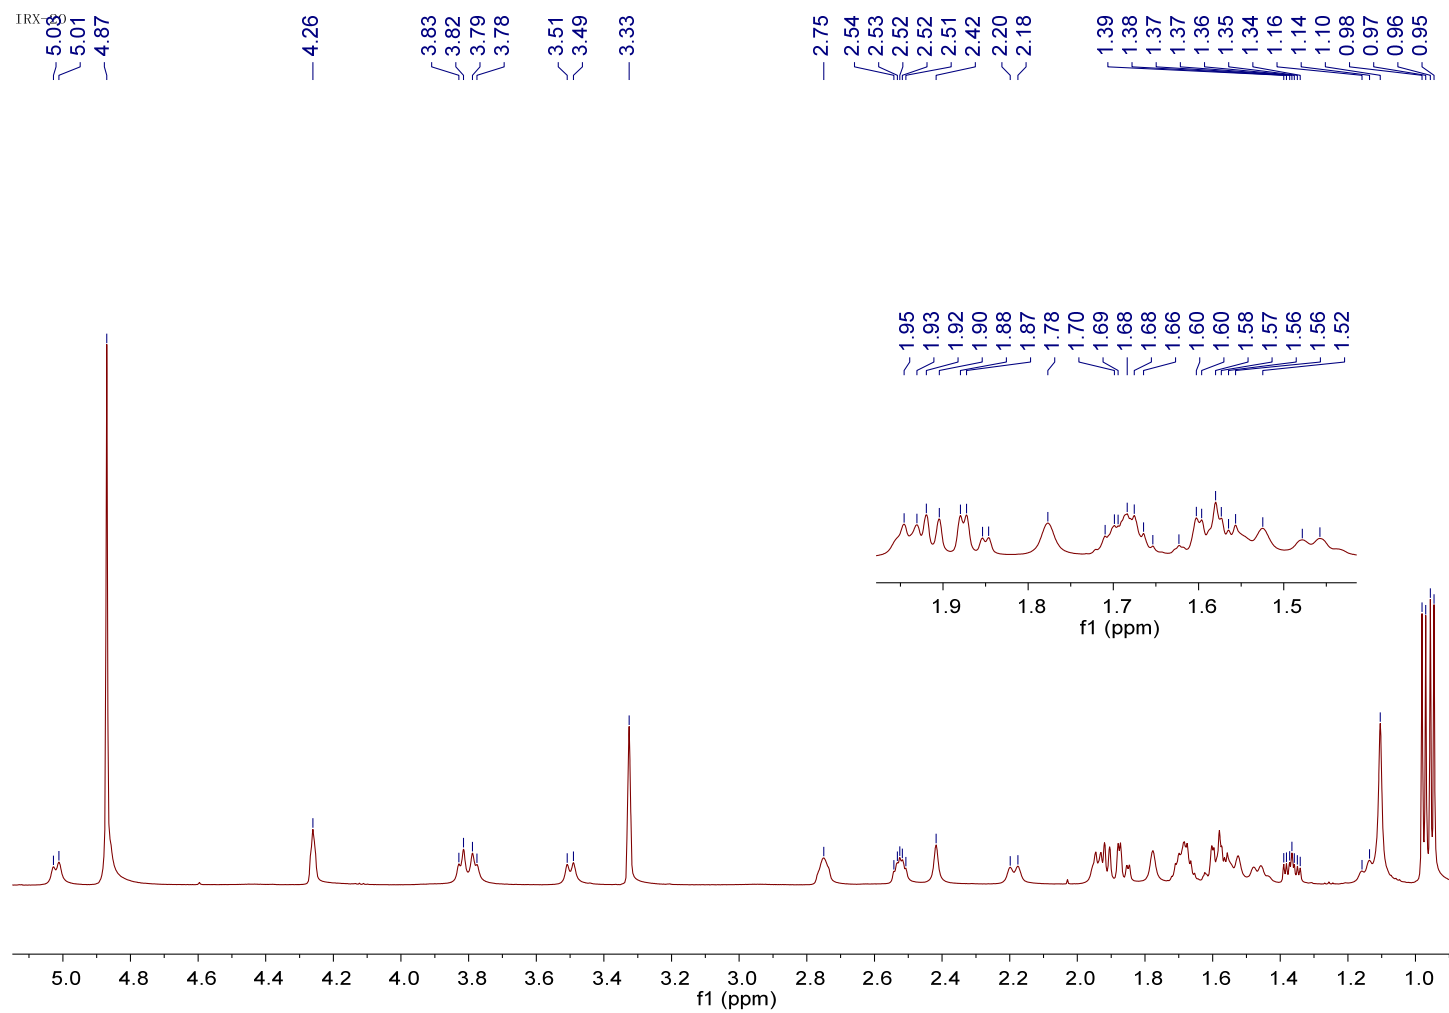

Figure S3. <sup>1</sup>H NMR spectrum of **1** in CD<sub>3</sub>OD (600 MHz).

IRX-3  
— 215.9

~ 177.0  
~ 174.9

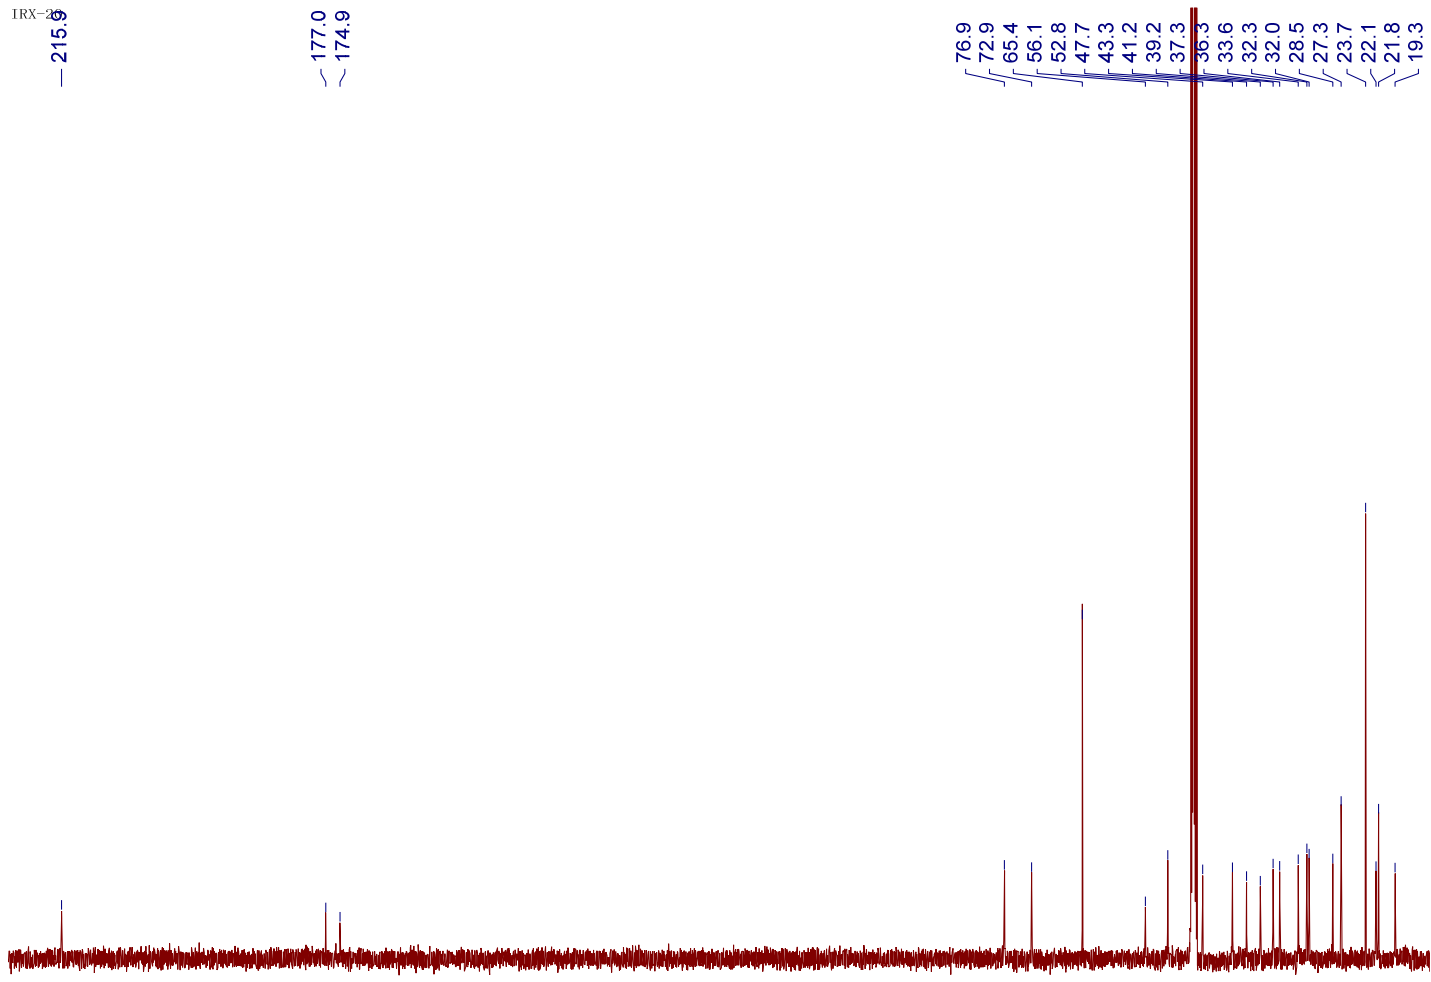

Figure S4.  $^{13}\text{C}$  NMR spectrum of **1** in  $\text{CD}_3\text{OD}$  (150 MHz).

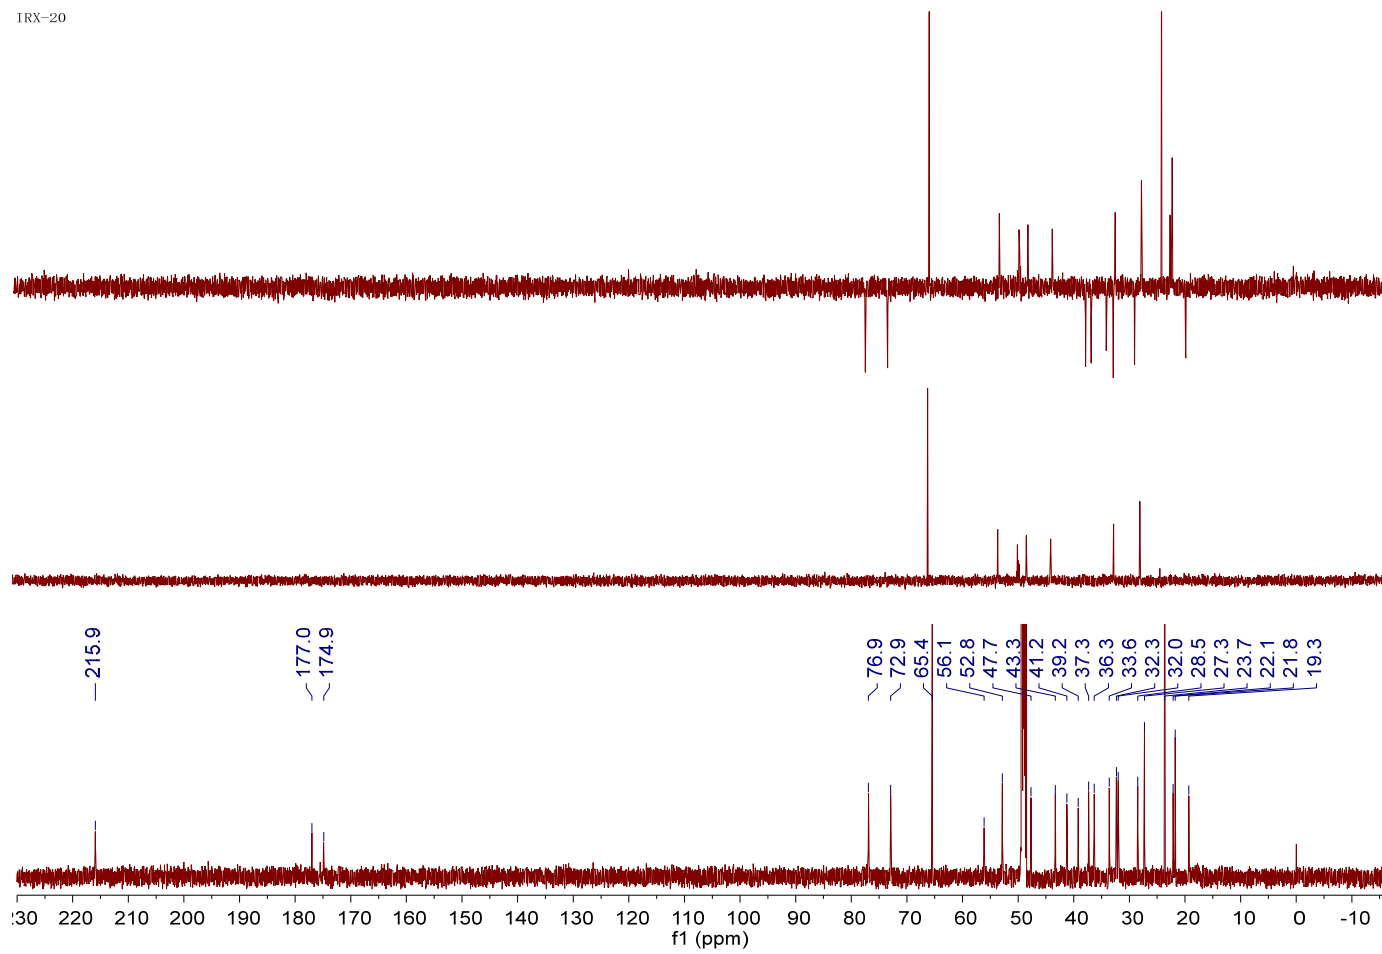



Figure S5. DEPT spectrum of **1** in CD<sub>3</sub>OD.

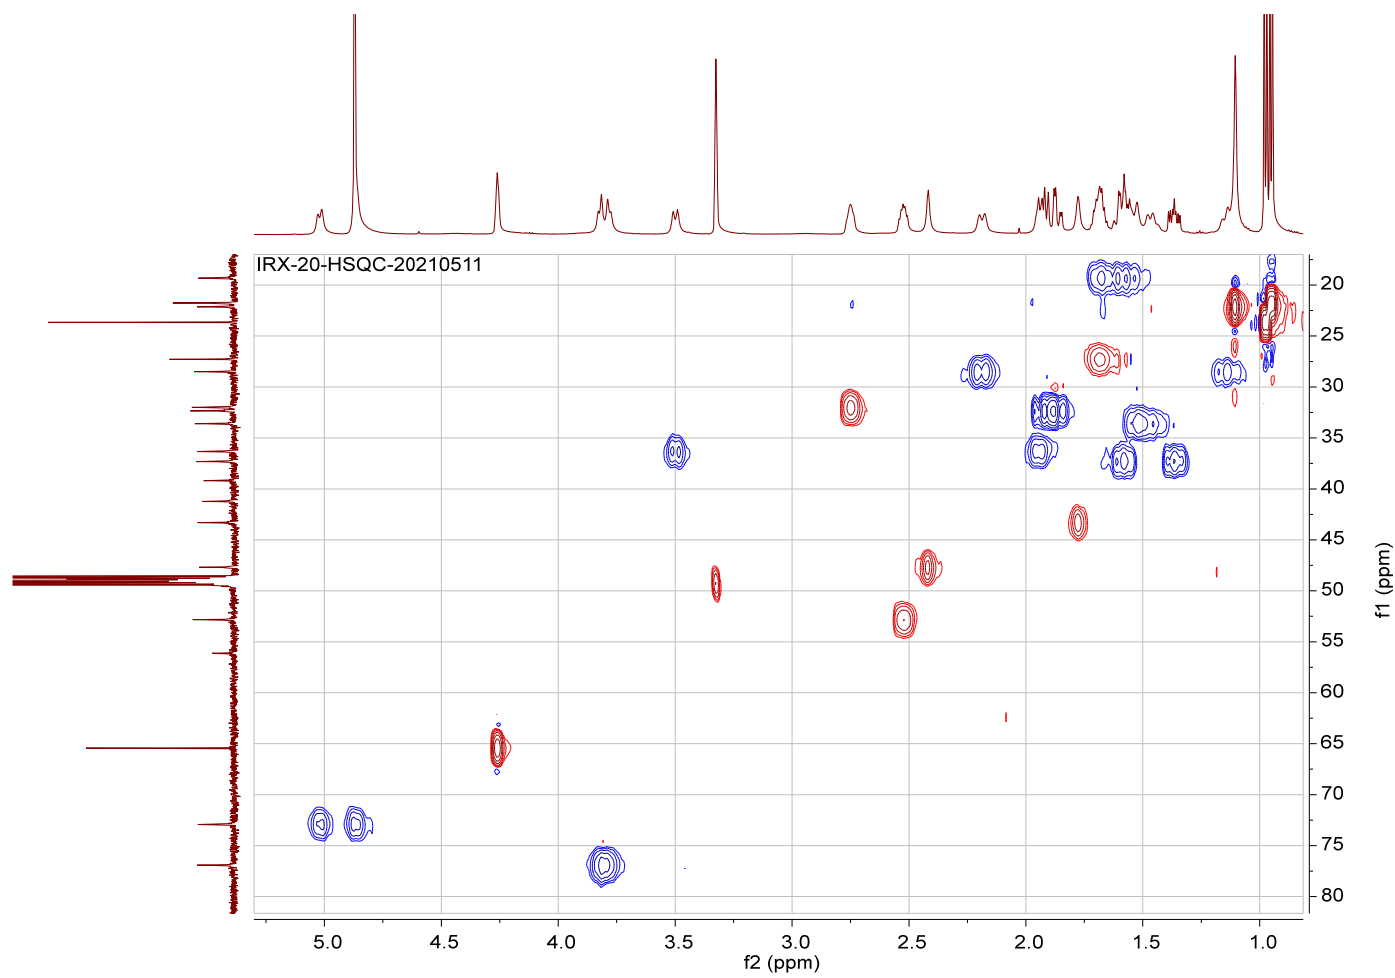

Figure S6. HSQC spectrum of **1** in CD<sub>3</sub>OD.

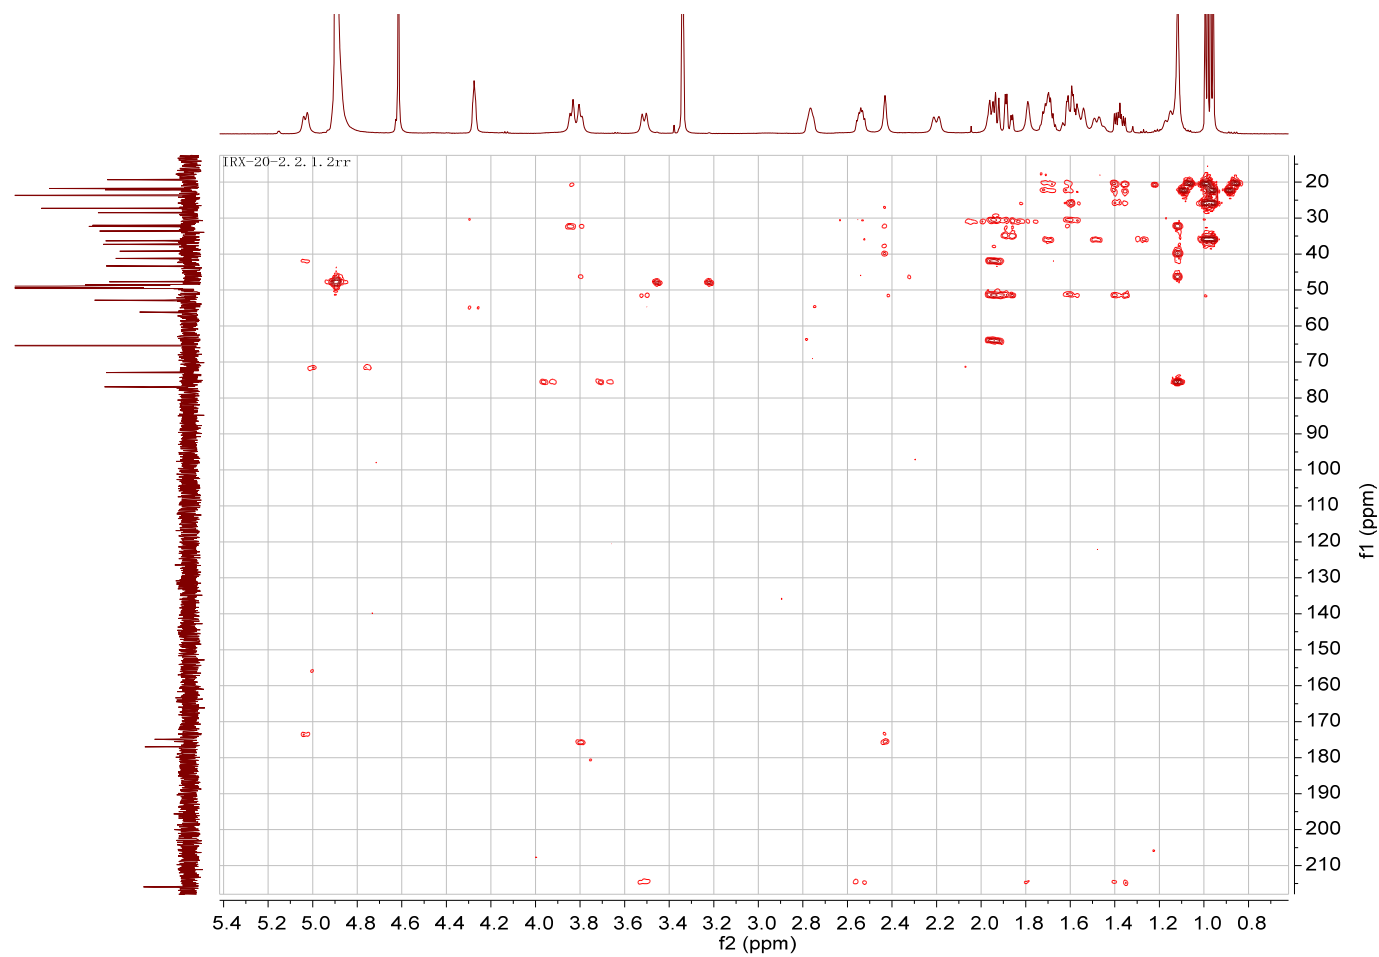

Figure S7. HMBC spectrum of **1** in CD<sub>3</sub>OD.

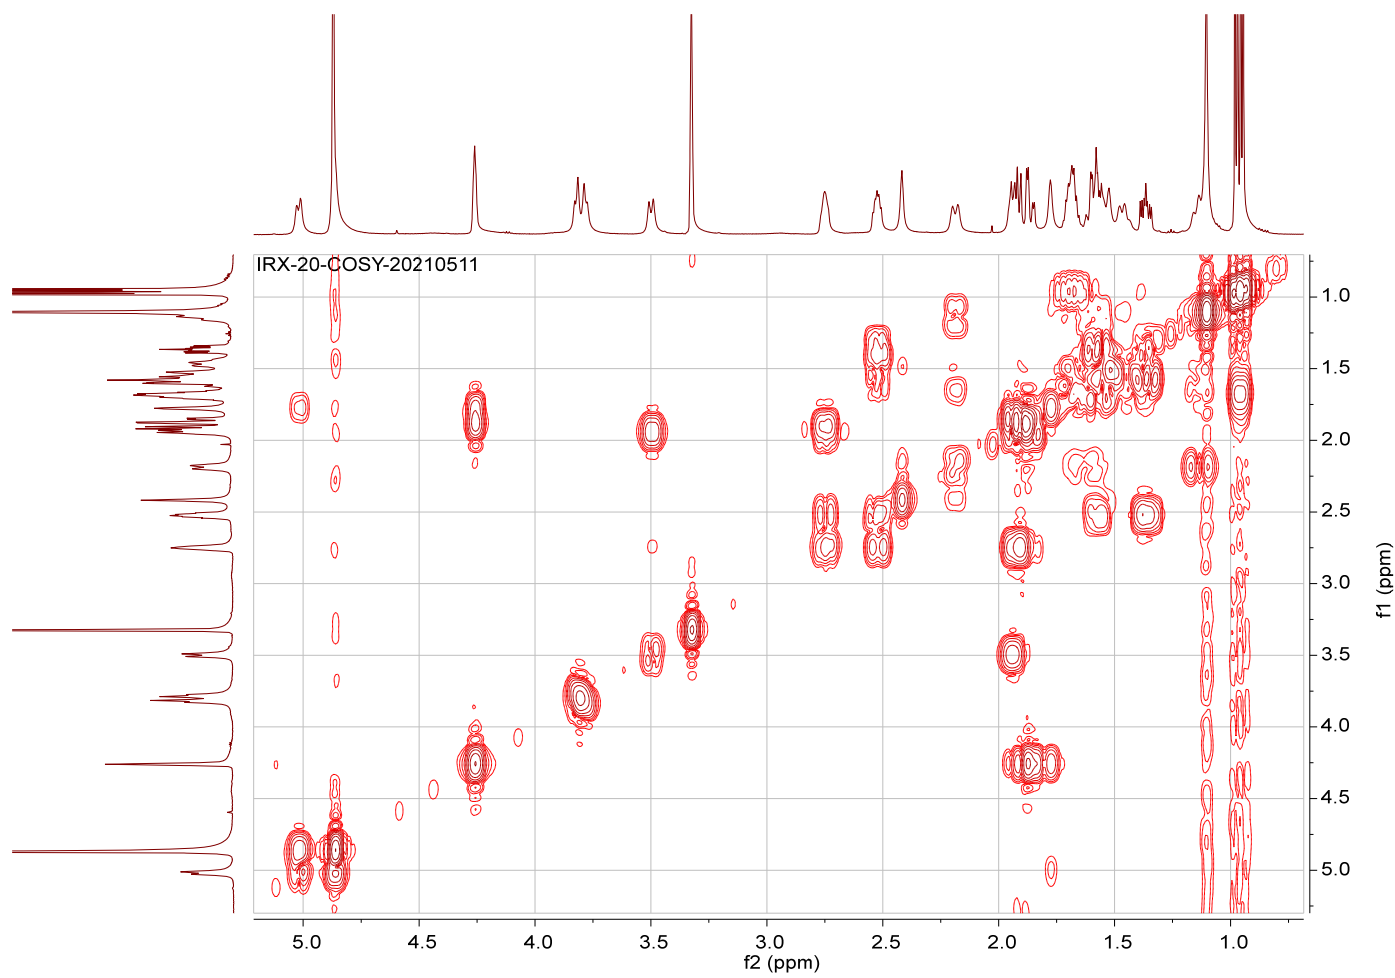

Figure S8.  $^1\text{H}$ - $^1\text{H}$  COSY spectrum of **1** in  $\text{CD}_3\text{OD}$ .

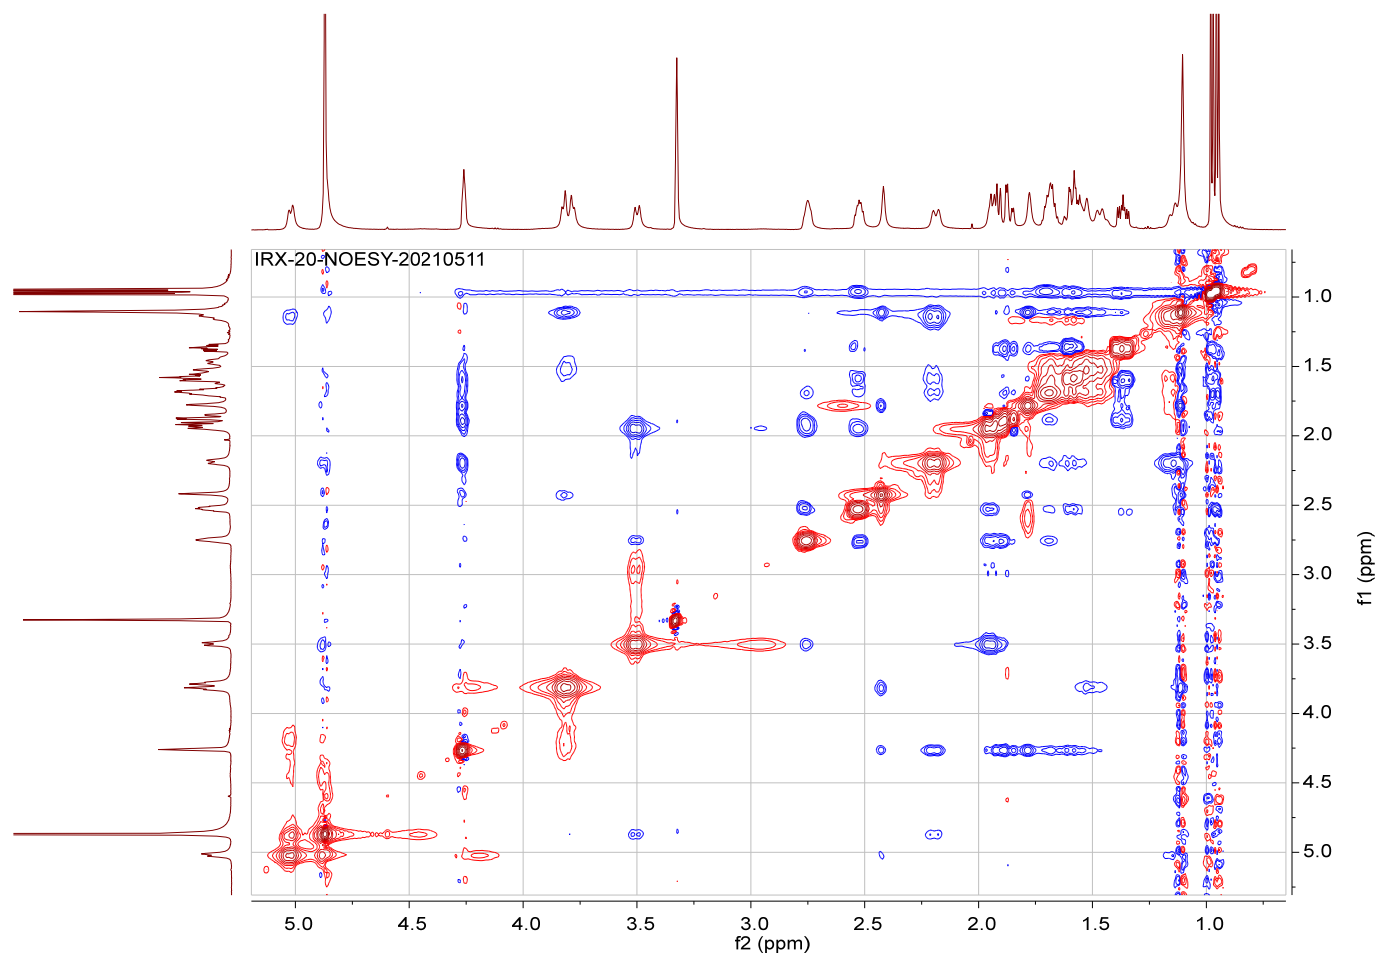

Figure S9. NOESY spectrum of **1** in CD<sub>3</sub>OD.

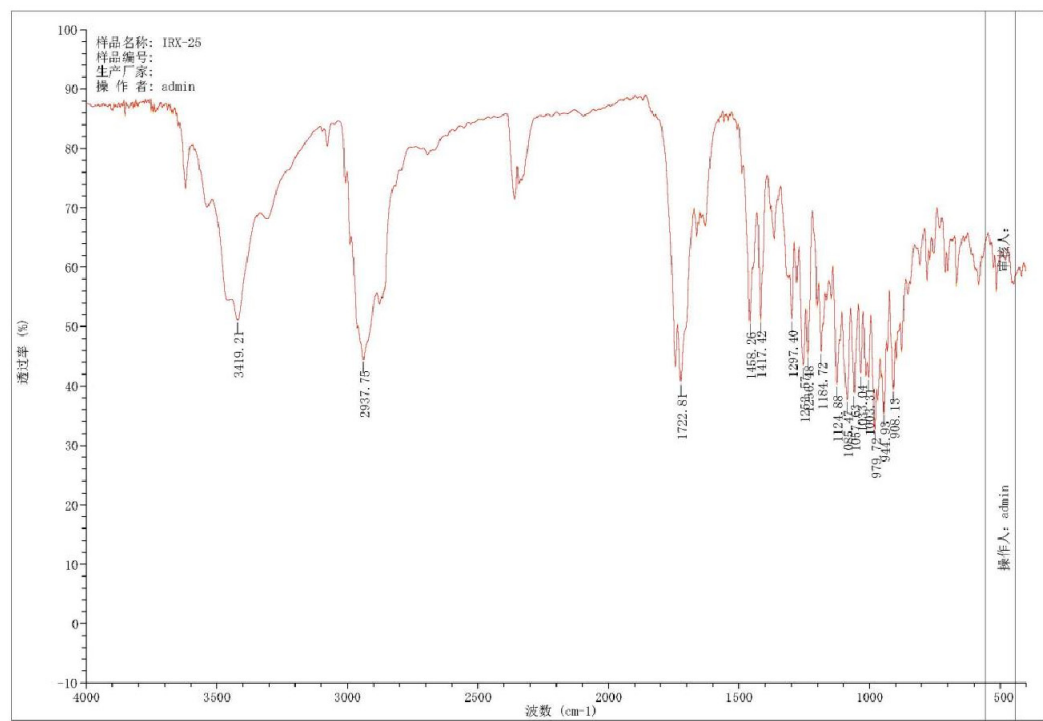

Figure S10. The IR (KBr disc) spectrum of **2**.

IRX-25 #8 RT: 0.04 AV: 1 NL: 3.46E8  
T: FTMS + p ESI Full ms [120.0000-1800.0000]

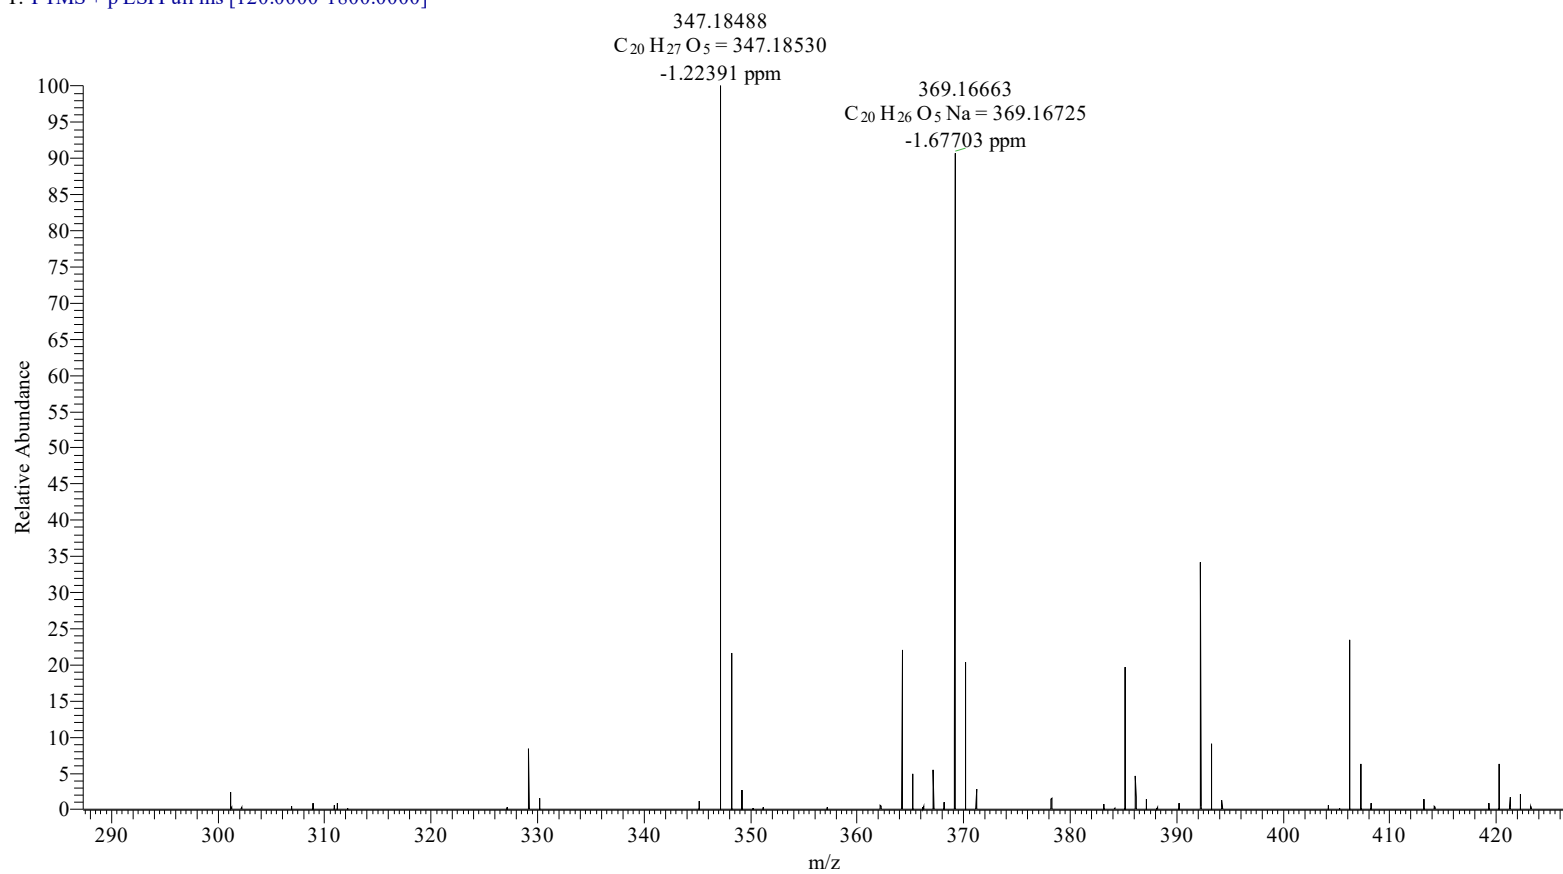

Figure S11. The HR-ESI-MS spectrum of **2**.

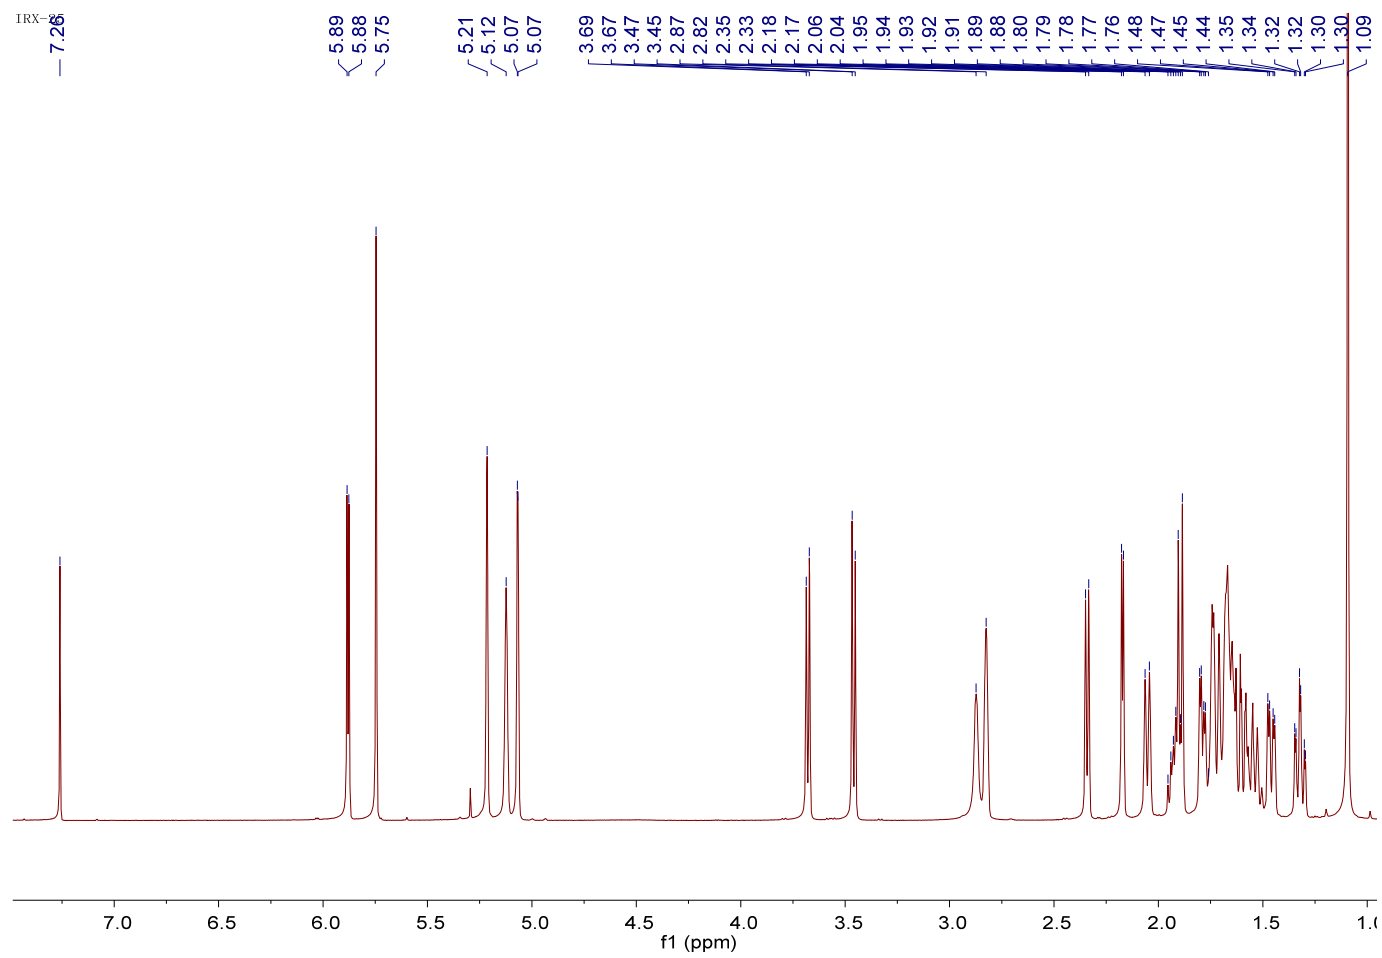

Figure S12. <sup>1</sup>H NMR spectrum of **2** in CDCl<sub>3</sub> (600 MHz).

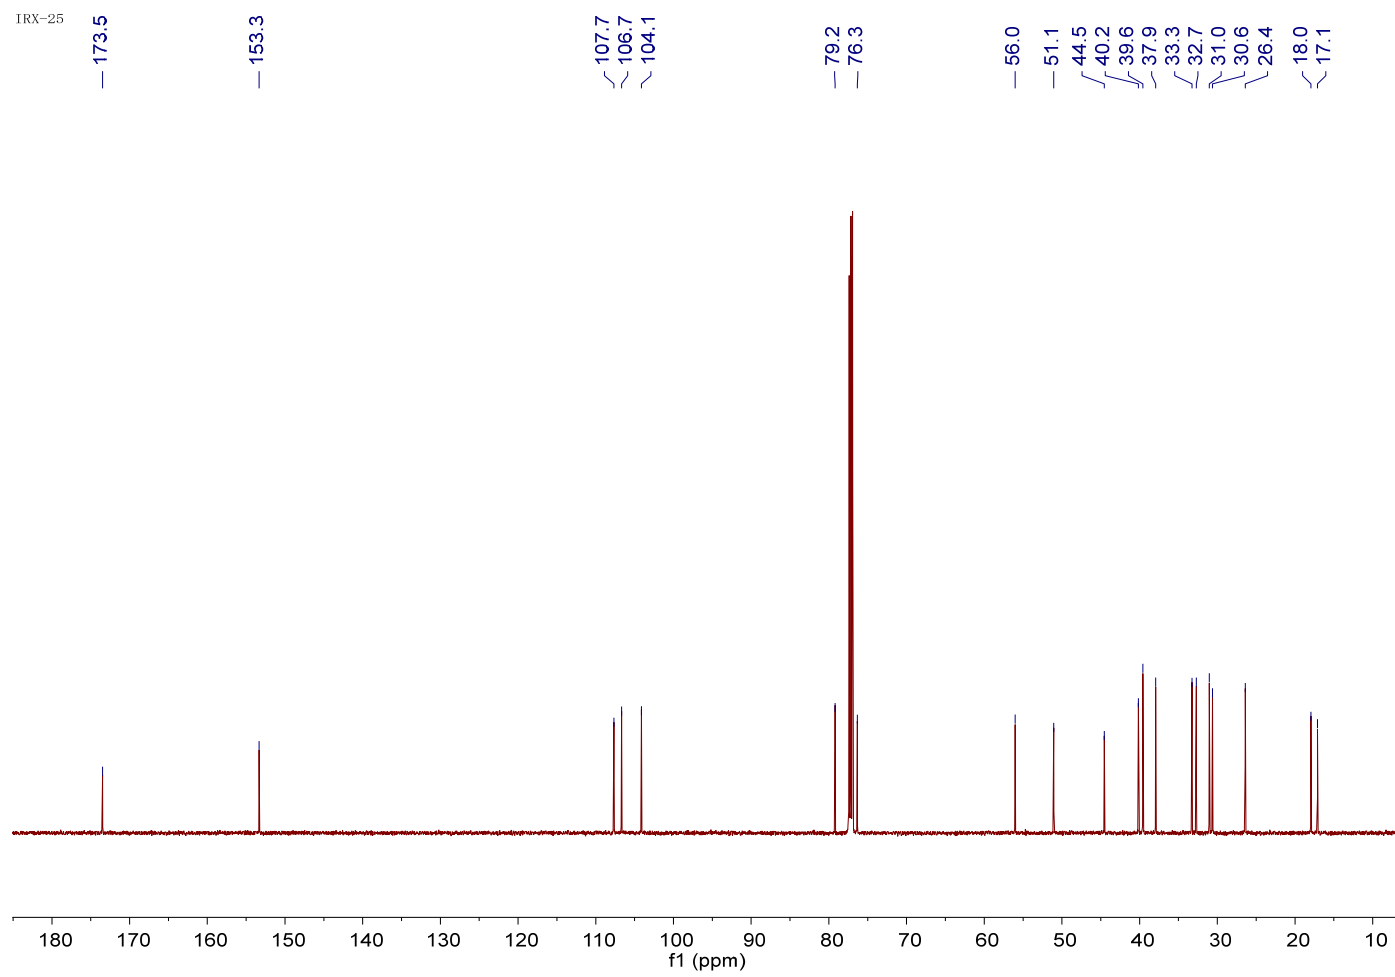

Figure S13.  $^{13}\text{C}$  NMR spectrum of **2** in  $\text{CDCl}_3$  (150 MHz).



IRX-25-0923

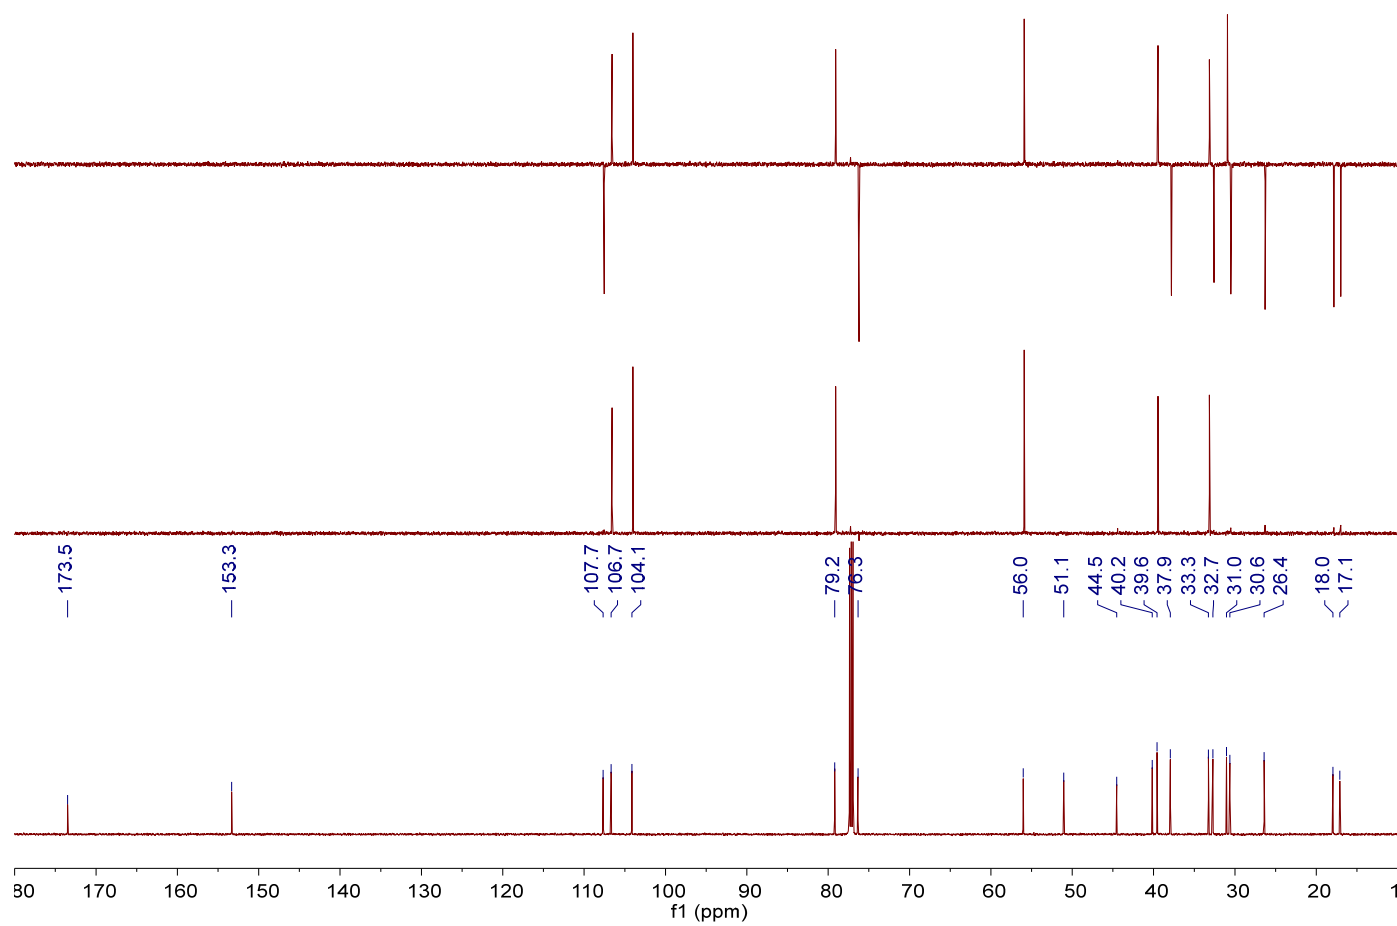

Figure S14. DEPT spectrum of **2** in  $\text{CDCl}_3$ .

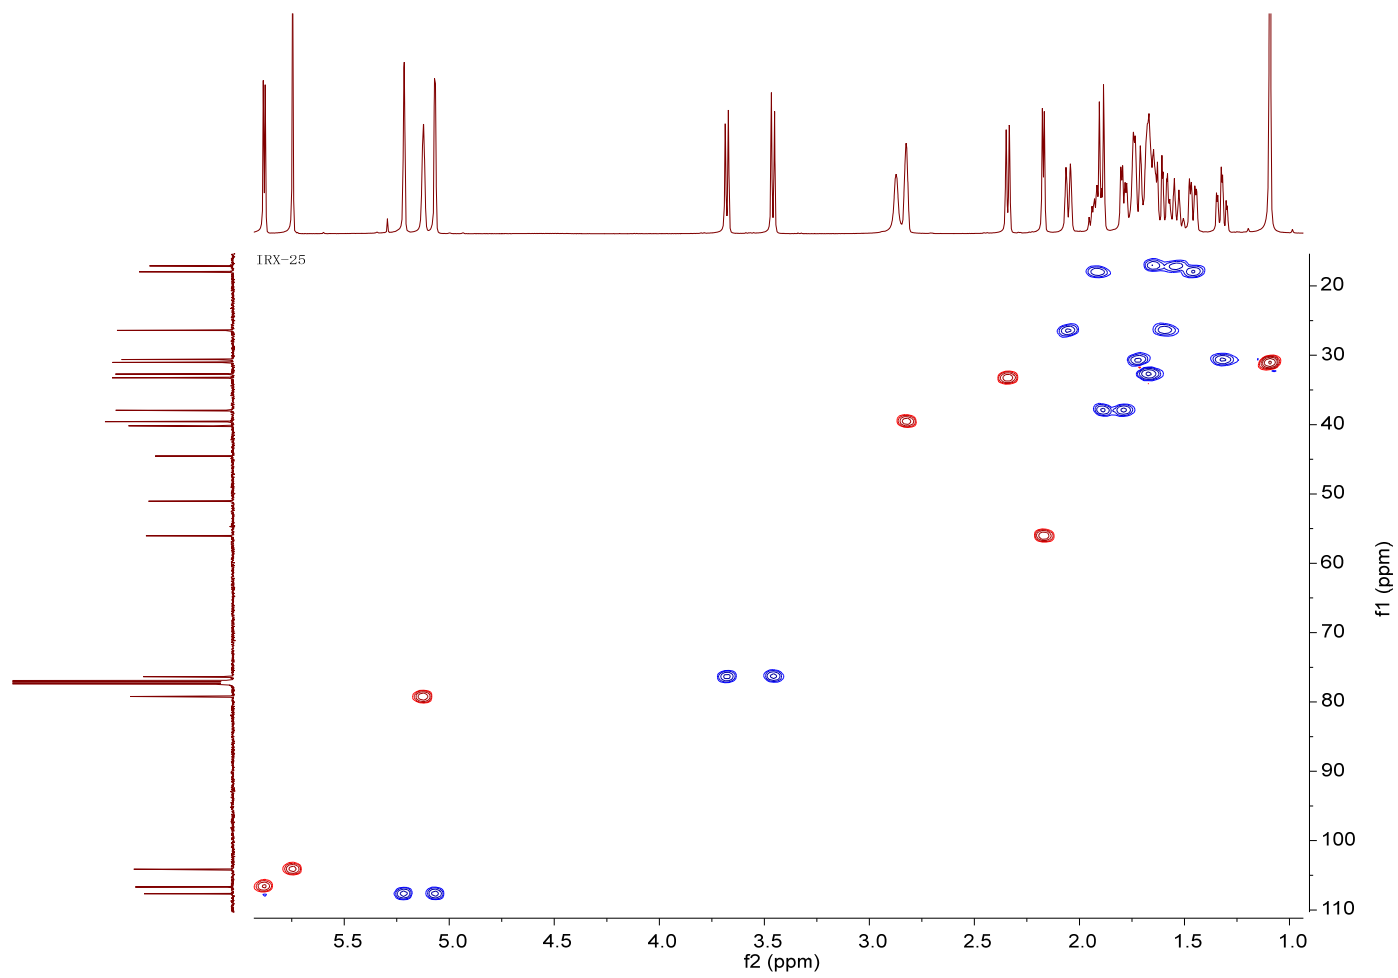

Figure S15. HSQC spectrum of **2** in CDCl<sub>3</sub>.

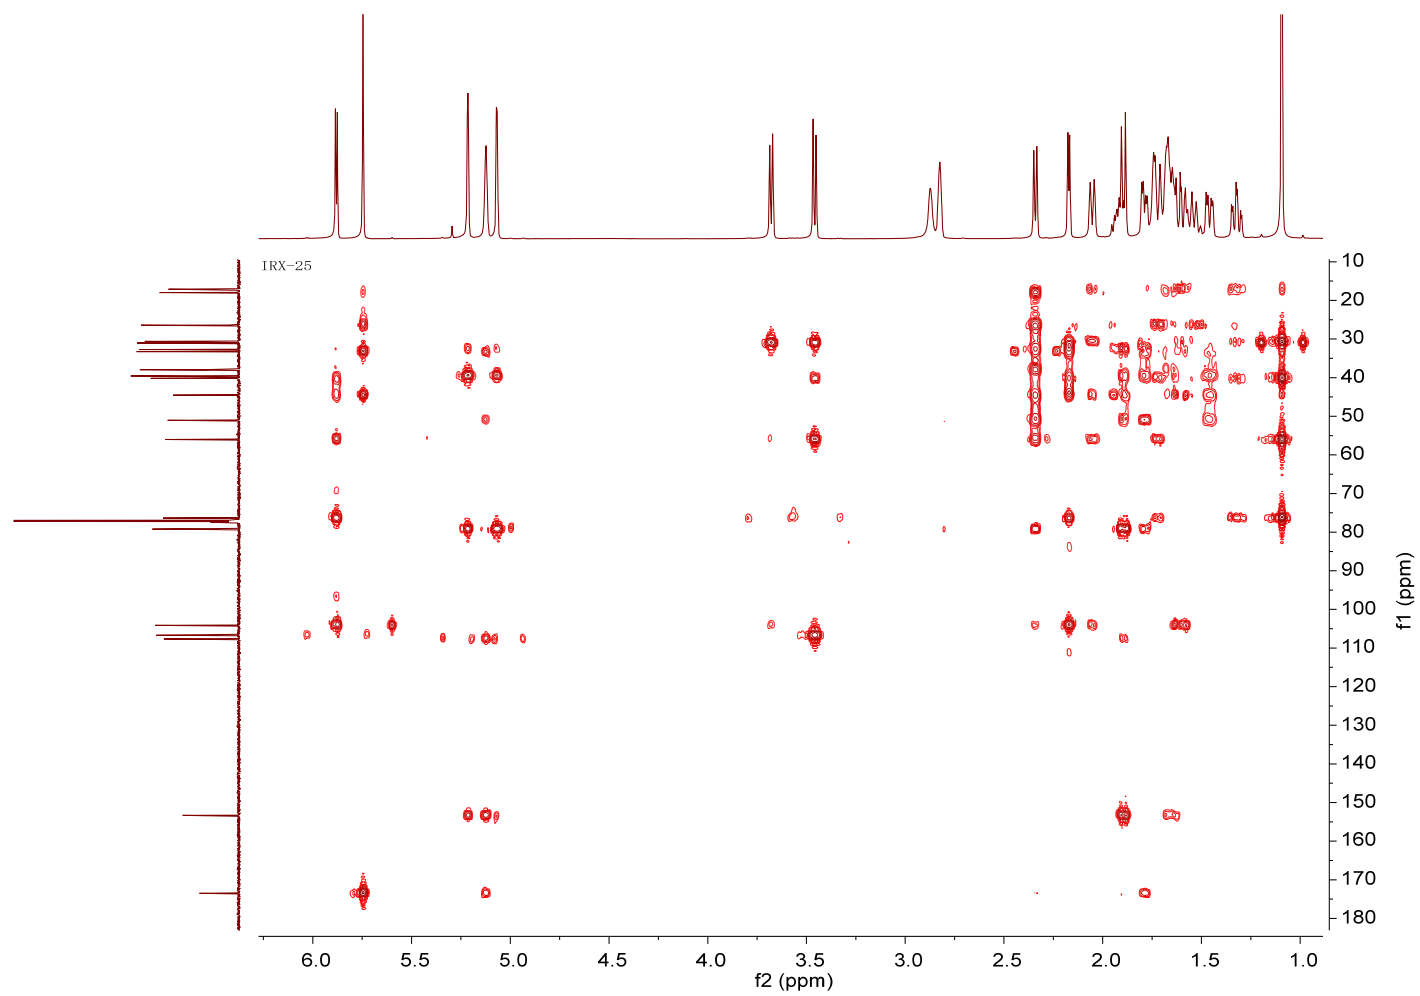

Figure S16. HMBC spectrum of **2** in CDCl<sub>3</sub>.

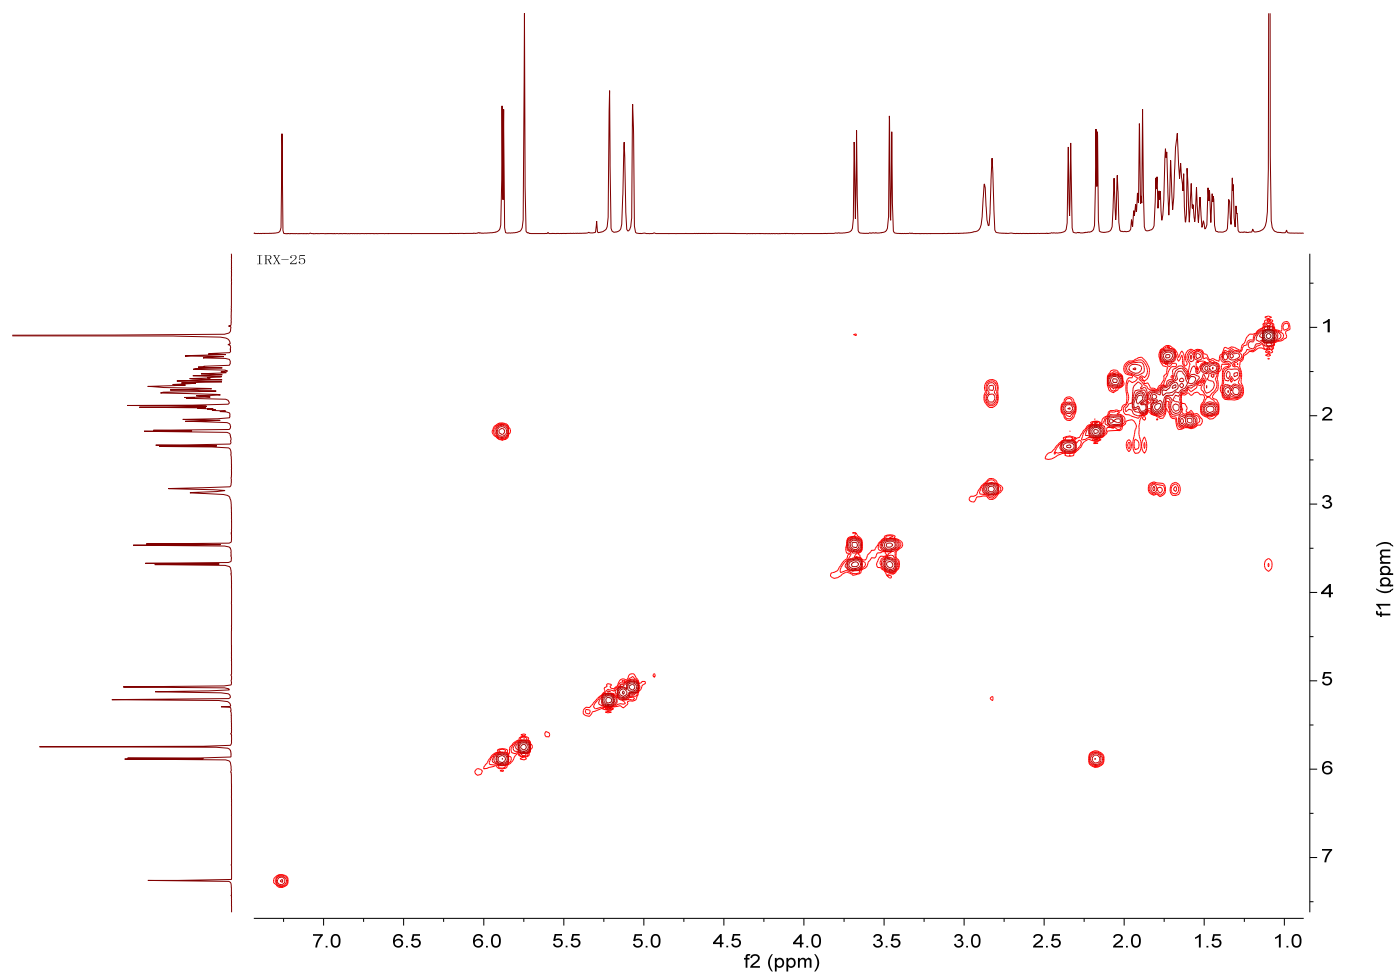

Figure S17.  $^1\text{H}$ - $^1\text{H}$  COSY spectrum of **2** in  $\text{CDCl}_3$ .

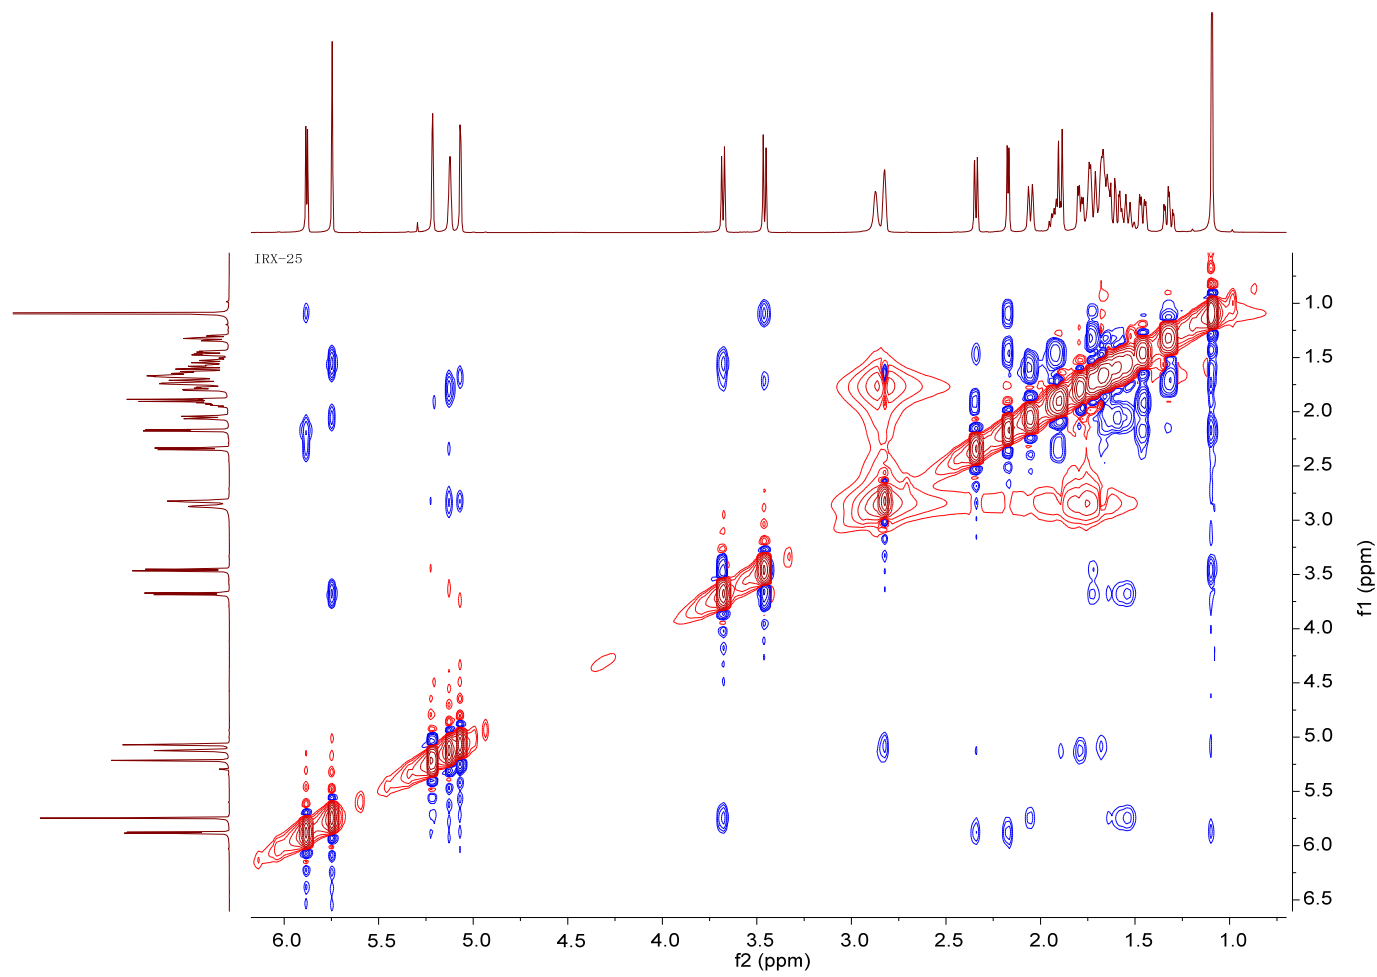

Figure S18. NOESY spectrum of **2** in CDCl<sub>3</sub>.

## Crystal Structure Report for Compound 1

data\_a

\_audit\_creation\_date 2023-08-14

\_audit\_creation\_method

;

Olex2 1.2-beta

(compiled 2018.05.29 svn.r3508 for OlexSys, GUI svn.r5506)

;

\_shelx\_SHELXL\_version\_number '2014/7'

\_audit\_contact\_author\_address ?

\_audit\_contact\_author\_email ?

\_audit\_contact\_author\_name ''

\_audit\_contact\_author\_phone ?

\_publ\_contact\_author\_id\_orcid ?

\_publ\_section\_references

;

Dolomanov, O.V., Bourhis, L.J., Gildea, R.J., Howard, J.A.K. & Puschmann, H.

(2009), J. Appl. Cryst. 42, 339-341.

Sheldrick, G.M. (2015). Acta Cryst. A71, 3-8.

Sheldrick, G.M. (2015). Acta Cryst. C71, 3-8.

;

\_chemical\_name\_common ?

\_chemical\_name\_systematic ?

\_chemical\_formula\_moiety 'C23 H32 O6'

```

_chemical_formula_sum          'C23 H32 O6'
_chemical_formula_weight      404.48
_chemical_absolute_configuration  ad
_chemical_melting_point       ?
loop_
  _atom_type_symbol
  _atom_type_description
  _atom_type_scatter_dispersion_real
  _atom_type_scatter_dispersion_imag
  _atom_type_scatter_source
'C' 'C' 0.0181 0.0091 'International Tables Vol C Tables 4.2.6.8 and 6.1.1.4'
'H' 'H' 0.0000 0.0000 'International Tables Vol C Tables 4.2.6.8 and 6.1.1.4'
'O' 'O' 0.0492 0.0322 'International Tables Vol C Tables 4.2.6.8 and 6.1.1.4'

```

```
_shelx_space_group_comment
```

```
;
```

The symmetry employed for this shelxl refinement is uniquely defined by the following loop, which should always be used as a source of symmetry information in preference to the above space-group names. They are only intended as comments.

```
;
```

```

_space_group_crystal_system    'orthorhombic'
_space_group_IT_number         19
_space_group_name_H-M_alt      'P 21 21 21'
_space_group_name_Hall         'P 2ac 2ab'
loop_
  _space_group_symop_operation_xyz
'x, y, z'
'-x+1/2, -y, z+1/2'

```

'-x, y+1/2, -z+1/2'

'x+1/2, -y+1/2, -z'

|                                 |             |
|---------------------------------|-------------|
| _cell_length_a                  | 8.0160(4)   |
| _cell_length_b                  | 13.0903(6)  |
| _cell_length_c                  | 19.9957(9)  |
| _cell_angle_alpha               | 90          |
| _cell_angle_beta                | 90          |
| _cell_angle_gamma               | 90          |
| _cell_volume                    | 2098.19(17) |
| _cell_formula_units_Z           | 4           |
| _cell_measurement_reflns_used   | 9820        |
| _cell_measurement_temperature   | 273(2)      |
| _cell_measurement_theta_max     | 79.42       |
| _cell_measurement_theta_min     | 4.04        |
| _shelx_estimated_absorpt_T_max  | 0.896       |
| _shelx_estimated_absorpt_T_min  | 0.877       |
| _exptl_absorpt_coefficient_mu   | 0.746       |
| _exptl_absorpt_correction_T_max | ?           |
| _exptl_absorpt_correction_T_min | ?           |
| _exptl_absorpt_correction_type  | 'none'      |
| _exptl_absorpt_process_details  | ?           |
| _exptl_absorpt_special_details  | ?           |
| _exptl_crystal_colour           | colourless  |
| _exptl_crystal_density_diffn    | 1.280       |
| _exptl_crystal_density_meas     | ?           |
| _exptl_crystal_density_method   | ?           |
| _exptl_crystal_description      | block       |
| _exptl_crystal_F_000            | 872         |



|                                                  |                      |
|--------------------------------------------------|----------------------|
| _exptl_crystal_size_max                          | 0.18                 |
| _exptl_crystal_size_mid                          | 0.17                 |
| _exptl_crystal_size_min                          | 0.15                 |
| _exptl_transmission_factor_max                   | ?                    |
| _exptl_transmission_factor_min                   | ?                    |
| _diffn_reflns_av_R_equivalents                   | 0.0688               |
| _diffn_reflns_av_unetl/netl                      | 0.0359               |
| _diffn_reflns_Laue_measured_fraction_full        | 0.999                |
| _diffn_reflns_Laue_measured_fraction_max         | 0.994                |
| _diffn_reflns_limit_h_max                        | 10                   |
| _diffn_reflns_limit_h_min                        | -9                   |
| _diffn_reflns_limit_k_max                        | 12                   |
| _diffn_reflns_limit_k_min                        | -16                  |
| _diffn_reflns_limit_l_max                        | 24                   |
| _diffn_reflns_limit_l_min                        | -25                  |
| _diffn_reflns_number                             | 30644                |
| _diffn_reflns_point_group_measured_fraction_full | 0.999                |
| _diffn_reflns_point_group_measured_fraction_max  | 0.985                |
| _diffn_reflns_theta_full                         | 67.679               |
| _diffn_reflns_theta_max                          | 80.009               |
| _diffn_reflns_theta_min                          | 4.036                |
| _diffn_ambient_temperature                       | 273.15               |
| _diffn_detector_area_resol_mean                  | ?                    |
| _diffn_measured_fraction_theta_full              | 0.999                |
| _diffn_measured_fraction_theta_max               | 0.994                |
| _diffn_measurement_device_type                   | 'Bruker APEX-II CCD' |
| _diffn_measurement_method                        | '\f and \w scans'    |
| _diffn_radiation_type                            | CuK\alpha            |
| _diffn_radiation_wavelength                      | 1.54178              |

|                               |       |
|-------------------------------|-------|
| _diffrn_source                | ?     |
| _diffrn_standards_number      | 0     |
| _reflns_Friedel_coverage      | 0.735 |
| _reflns_Friedel_fraction_full | 0.998 |
| _reflns_Friedel_fraction_max  | 0.972 |
| _reflns_number_gt             | 4267  |
| _reflns_number_total          | 4524  |
| _reflns_special_details       |       |

;

Reflections were merged by SHELXL according to the crystal class for the calculation of statistics and refinement.

\_reflns\_Friedel\_fraction is defined as the number of unique Friedel pairs measured divided by the number that would be possible theoretically, ignoring centric projections and systematic absences.

;

|                                  |                                  |
|----------------------------------|----------------------------------|
| _reflns_threshold_expression     | 'I > 2\sigma(I)'                 |
| _computing_cell_refinement       | ?                                |
| _computing_data_collection       | ?                                |
| _computing_data_reduction        | ?                                |
| _computing_molecular_graphics    | 'Olex2 (Dolomanov et al., 2009)' |
| _computing_publication_material  | 'Olex2 (Dolomanov et al., 2009)' |
| _computing_structure_refinement  | 'ShelXL (Sheldrick, 2015)'       |
| _computing_structure_solution    | 'ShelXT (Sheldrick, 2015)'       |
| _refine_diff_density_max         | 0.336                            |
| _refine_diff_density_min         | -0.262                           |
| _refine_diff_density_rms         | 0.053                            |
| _refine_ls_abs_structure_details |                                  |

```

;
  Flack x determined using 1706 quotients [(I+)-(I-)]/[(I+)+(I-)]
  (Parsons, Flack and Wagner, Acta Cryst. B69 (2013) 249-259).
;
_refine_ls_abs_structure_Flack      0.00(6)
_refine_ls_extinction_coef          .
_refine_ls_extinction_method        none
_refine_ls_goodness_of_fit_ref      1.129
_refine_ls_hydrogen_treatment       constr
_refine_ls_matrix_type              full
_refine_ls_number_parameters        266
_refine_ls_number_reflns            4524
_refine_ls_number_restraints        0
_refine_ls_R_factor_all              0.0479
_refine_ls_R_factor_gt              0.0451
_refine_ls_restrained_S_all         1.129
_refine_ls_shift/su_max              0.000
_refine_ls_shift/su_mean             0.000
_refine_ls_structure_factor_coef     Fsqd
_refine_ls_weighting_details
  'w=1/[\s^2^(Fo^2^)+(0.1000P)^2^] where P=(Fo^2^+2Fc^2^)/3'
_refine_ls_weighting_scheme          calc
_refine_ls_wR_factor_gt              0.1309
_refine_ls_wR_factor_ref             0.1351
_refine_special_details              ?
_olex2_refinement_description
;
1. Fixed Uiso
  At 1.2 times of:

```

All C(H) groups, All C(H,H) groups

At 1.5 times of:

All C(H,H,H) groups, All O(H) groups

2.a Ternary CH refined with riding coordinates:

C9(H9), C16(H16), C11(H11), C5(H5), C13(H13), C21(H21)

2.b Secondary CH2 refined with riding coordinates:

C20(H20A,H20B), C14(H14A,H14B), C12(H12A,H12B), C1(H1A,H1B), C17(H17A,H17B),  
C3(H3A,H3B), C2(H2A,H2B), C19(H19A,H19B)

2.c Idealised Me refined as rotating group:

C18(H18A,H18B,H18C), C23(H23A,H23B,H23C), C22(H22A,H22B,H22C)

2.d Idealised tetrahedral OH refined as rotating group:

O1(H1)

;

\_atom\_sites\_solution\_hydrogens geom

\_atom\_sites\_solution\_primary dual

\_atom\_sites\_solution\_secondary ?

loop\_

\_atom\_site\_label

\_atom\_site\_type\_symbol

\_atom\_site\_fract\_x

\_atom\_site\_fract\_y

\_atom\_site\_fract\_z

\_atom\_site\_U\_iso\_or\_equiv

\_atom\_site\_adp\_type

\_atom\_site\_occupancy

\_atom\_site\_site\_symmetry\_order

\_atom\_site\_calc\_flag

\_atom\_site\_refinement\_flags\_posn

\_atom\_site\_refinement\_flags\_adp

\_atom\_site\_refinement\_flags\_occupancy

\_atom\_site\_disorder\_assembly

\_atom\_site\_disorder\_group

O3 O 0.0753(2) 0.54872(10) 0.67680(8) 0.0444(4) Uani 1 1 d . . . . .  
O1 O -0.0413(2) 0.32034(11) 0.78771(10) 0.0481(4) Uani 1 1 d . . . . .  
H1 H -0.0992 0.2689 0.7848 0.072 Uiso 1 1 calc GR . . . .  
O6 O 0.5341(2) 0.52010(12) 0.75551(8) 0.0482(4) Uani 1 1 d . . . . .  
O5 O 0.2242(3) 0.64999(10) 0.73988(9) 0.0555(5) Uani 1 1 d . . . . .  
O4 O 0.3947(4) 0.42447(18) 0.50686(9) 0.0731(7) Uani 1 1 d . . . . .  
O2 O 0.1331(3) 0.46695(19) 0.52593(10) 0.0746(7) Uani 1 1 d . . . . .  
C9 C 0.2257(2) 0.36435(11) 0.73769(8) 0.0281(4) Uani 1 1 d . . . . .  
H9 H 0.3400 0.3380 0.7356 0.034 Uiso 1 1 calc R . . . .  
C15 C 0.4235(3) 0.48450(12) 0.78914(9) 0.0340(4) Uani 1 1 d . . . . .  
C10 C 0.1637(3) 0.36921(12) 0.66416(9) 0.0313(4) Uani 1 1 d . . . . .  
C16 C 0.4414(3) 0.43742(13) 0.85878(9) 0.0363(4) Uani 1 1 d . . . . .  
H16 H 0.4711 0.4933 0.8891 0.044 Uiso 1 1 calc R . . . .  
C20 C 0.0188(3) 0.44506(13) 0.66282(11) 0.0408(5) Uani 1 1 d . . . . .  
H20A H -0.0339 0.4432 0.6192 0.049 Uiso 1 1 calc R . . . .  
H20B H -0.0636 0.4251 0.6958 0.049 Uiso 1 1 calc R . . . .  
C11 C 0.1306(3) 0.29228(12) 0.78524(10) 0.0363(4) Uani 1 1 d . . . . .  
H11 H 0.1392 0.2224 0.7680 0.044 Uiso 1 1 calc R . . . .  
C8 C 0.2397(3) 0.47478(12) 0.76891(9) 0.0314(4) Uani 1 1 d . . . . .  
C14 C 0.1567(3) 0.48215(14) 0.83884(10) 0.0396(4) Uani 1 1 d . . . . .  
H14A H 0.1668 0.5502 0.8576 0.048 Uiso 1 1 calc R . . . .  
H14B H 0.0400 0.4626 0.8374 0.048 Uiso 1 1 calc R . . . .  
C7 C 0.1819(3) 0.56352(13) 0.72668(10) 0.0382(5) Uani 1 1 d . . . . .  
C5 C 0.3105(3) 0.40420(12) 0.61881(9) 0.0340(4) Uani 1 1 d . . . . .  
H5 H 0.3627 0.4635 0.6403 0.041 Uiso 1 1 calc R . . . .  
C12 C 0.2099(3) 0.29591(15) 0.85515(10) 0.0430(5) Uani 1 1 d . . . . .

H12A H 0.3076 0.2522 0.8555 0.052 Uiso 1 1 calc R . . . .  
H12B H 0.1310 0.2686 0.8873 0.052 Uiso 1 1 calc R . . . .  
C1 C 0.0993(3) 0.26567(14) 0.63804(10) 0.0396(5) Uani 1 1 d . . . . .  
H1A H 0.0170 0.2391 0.6691 0.048 Uiso 1 1 calc R . . . .  
H1B H 0.0445 0.2761 0.5953 0.048 Uiso 1 1 calc R . . . .  
C17 C 0.5819(3) 0.35943(17) 0.86297(10) 0.0434(5) Uani 1 1 d . . . . .  
H17A H 0.6833 0.3899 0.8456 0.052 Uiso 1 1 calc R . . . .  
H17B H 0.5544 0.3015 0.8348 0.052 Uiso 1 1 calc R . . . .  
C13 C 0.2617(3) 0.40442(14) 0.87738(9) 0.0384(4) Uani 1 1 d . . . . .  
H13 H 0.2437 0.4125 0.9256 0.046 Uiso 1 1 calc R . . . .  
C4 C 0.4502(3) 0.32587(15) 0.60369(10) 0.0419(5) Uani 1 1 d . . . . .  
C21 C 0.6141(4) 0.32140(18) 0.93460(11) 0.0496(6) Uani 1 1 d . . . . .  
H21 H 0.5060 0.3148 0.9571 0.059 Uiso 1 1 calc R . . . .  
C3 C 0.3706(4) 0.22416(17) 0.58130(12) 0.0516(6) Uani 1 1 d . . . . .  
H3A H 0.3211 0.2331 0.5374 0.062 Uiso 1 1 calc R . . . .  
H3B H 0.4570 0.1726 0.5776 0.062 Uiso 1 1 calc R . . . .  
C2 C 0.2380(4) 0.18703(14) 0.62946(12) 0.0485(6) Uani 1 1 d . . . . .  
H2A H 0.2887 0.1733 0.6726 0.058 Uiso 1 1 calc R . . . .  
H2B H 0.1908 0.1237 0.6129 0.058 Uiso 1 1 calc R . . . .  
C6 C 0.2626(4) 0.43573(17) 0.54741(11) 0.0515(6) Uani 1 1 d . . . . .  
C18 C 0.5841(4) 0.3081(2) 0.65691(13) 0.0549(6) Uani 1 1 d . . . . .  
H18A H 0.6153 0.3723 0.6765 0.082 Uiso 1 1 calc GR . . . .  
H18B H 0.6802 0.2771 0.6366 0.082 Uiso 1 1 calc GR . . . .  
H18C H 0.5410 0.2638 0.6910 0.082 Uiso 1 1 calc GR . . . .  
C19 C 0.5293(5) 0.3794(2) 0.54350(13) 0.0635(7) Uani 1 1 d . . . . .  
H19A H 0.6072 0.4315 0.5582 0.076 Uiso 1 1 calc R . . . .  
H19B H 0.5888 0.3306 0.5159 0.076 Uiso 1 1 calc R . . . .  
C23 C 0.7188(6) 0.3976(3) 0.97398(16) 0.0776(10) Uani 1 1 d . . . . .  
H23A H 0.8283 0.4018 0.9547 0.116 Uiso 1 1 calc GR . . . .

H23B H 0.7275 0.3755 1.0196 0.116 Uiso 1 1 calc GR . . . .  
H23C H 0.6668 0.4636 0.9724 0.116 Uiso 1 1 calc GR . . . .  
C22 C 0.6962(6) 0.2169(2) 0.93384(16) 0.0803(11) Uani 1 1 d . . . . .  
H22A H 0.6244 0.1690 0.9116 0.120 Uiso 1 1 calc GR . . . .  
H22B H 0.7155 0.1947 0.9789 0.120 Uiso 1 1 calc GR . . . .  
H22C H 0.8006 0.2209 0.9105 0.120 Uiso 1 1 calc GR . . . .

loop\_

\_atom\_site\_aniso\_label  
\_atom\_site\_aniso\_U\_11  
\_atom\_site\_aniso\_U\_22  
\_atom\_site\_aniso\_U\_33  
\_atom\_site\_aniso\_U\_23  
\_atom\_site\_aniso\_U\_13  
\_atom\_site\_aniso\_U\_12

O3 0.0497(10) 0.0295(6) 0.0539(8) 0.0016(5) -0.0142(8) 0.0097(6)  
O1 0.0374(9) 0.0405(7) 0.0663(10) -0.0033(6) 0.0083(8) -0.0097(6)  
O6 0.0469(9) 0.0519(8) 0.0458(8) 0.0088(6) -0.0030(7) -0.0132(7)  
O5 0.0756(14) 0.0252(6) 0.0656(10) -0.0003(6) -0.0199(10) 0.0031(7)  
O4 0.0939(18) 0.0898(13) 0.0354(8) 0.0162(9) 0.0101(10) 0.0041(13)  
O2 0.0833(17) 0.0896(13) 0.0509(10) 0.0249(9) -0.0196(11) 0.0100(13)  
C9 0.0337(10) 0.0223(6) 0.0282(7) 0.0001(5) -0.0012(7) -0.0011(6)  
C15 0.0418(12) 0.0280(7) 0.0322(8) -0.0019(6) -0.0033(8) -0.0011(7)  
C10 0.0334(10) 0.0286(7) 0.0320(8) -0.0006(6) -0.0053(7) -0.0008(7)  
C16 0.0443(12) 0.0355(8) 0.0289(8) -0.0018(6) -0.0035(8) 0.0025(8)  
C20 0.0378(12) 0.0349(8) 0.0496(10) -0.0004(7) -0.0128(9) 0.0034(8)  
C11 0.0426(12) 0.0273(7) 0.0389(9) 0.0025(6) 0.0050(9) -0.0042(7)  
C8 0.0393(11) 0.0236(6) 0.0313(8) -0.0012(6) -0.0015(8) 0.0007(7)  
C14 0.0455(12) 0.0357(7) 0.0377(9) -0.0065(7) 0.0035(9) 0.0055(8)

C7 0.0479(12) 0.0244(7) 0.0423(9) -0.0010(6) -0.0050(9) 0.0060(8)  
 C5 0.0409(12) 0.0329(7) 0.0281(7) 0.0031(6) -0.0037(7) -0.0016(7)  
 C12 0.0545(14) 0.0378(8) 0.0367(9) 0.0083(7) 0.0064(10) -0.0042(9)  
 C1 0.0429(12) 0.0355(8) 0.0404(9) -0.0067(7) -0.0071(9) -0.0067(8)  
 C17 0.0477(13) 0.0471(10) 0.0353(9) 0.0048(7) -0.0028(9) 0.0097(9)  
 C13 0.0481(12) 0.0399(8) 0.0272(8) -0.0021(6) 0.0046(8) 0.0024(8)  
 C4 0.0444(12) 0.0468(10) 0.0345(9) -0.0031(7) 0.0033(9) 0.0041(9)  
 C21 0.0526(15) 0.0576(11) 0.0385(10) 0.0112(8) -0.0010(10) 0.0070(11)  
 C3 0.0622(17) 0.0455(10) 0.0473(11) -0.0140(8) 0.0014(12) 0.0095(10)  
 C2 0.0618(15) 0.0298(7) 0.0537(11) -0.0094(7) -0.0028(11) 0.0007(9)  
 C6 0.0710(18) 0.0501(10) 0.0333(10) 0.0102(8) -0.0066(11) 0.0003(12)  
 C18 0.0408(14) 0.0717(14) 0.0523(12) -0.0025(11) 0.0007(10) 0.0132(13)  
 C19 0.0663(18) 0.0762(16) 0.0478(12) 0.0040(11) 0.0188(13) 0.0002(15)  
 C23 0.093(3) 0.0840(19) 0.0554(15) 0.0022(13) -0.0285(17) 0.0015(19)  
 C22 0.112(3) 0.0673(15) 0.0616(16) 0.0209(13) -0.0081(19) 0.0332(19)

\_geom\_special\_details

;

All esds (except the esd in the dihedral angle between two l.s. planes)  
 are estimated using the full covariance matrix. The cell esds are taken  
 into account individually in the estimation of esds in distances, angles  
 and torsion angles; correlations between esds in cell parameters are only  
 used when they are defined by crystal symmetry. An approximate (isotropic)  
 treatment of cell esds is used for estimating esds involving l.s. planes.

;

loop\_

\_geom\_bond\_atom\_site\_label\_1

\_geom\_bond\_atom\_site\_label\_2

\_geom\_bond\_distance



\_geom\_bond\_site\_symmetry\_2

\_geom\_bond\_publ\_flag

O3 C20 1.457(2) . ?

O3 C7 1.328(3) . ?

O1 H1 0.8200 . ?

O1 C11 1.427(3) . ?

O6 C15 1.206(3) . ?

O5 C7 1.211(2) . ?

O4 C6 1.342(4) . ?

O4 C19 1.432(4) . ?

O2 C6 1.195(4) . ?

C9 H9 0.9800 . ?

C9 C10 1.553(2) . ?

C9 C11 1.541(2) . ?

C9 C8 1.579(2) . ?

C15 C16 1.529(2) . ?

C15 C8 1.533(3) . ?

C10 C20 1.528(3) . ?

C10 C5 1.555(3) . ?

C10 C1 1.541(2) . ?

C16 H16 0.9800 . ?

C16 C17 1.523(3) . ?

C16 C13 1.549(3) . ?

C20 H20A 0.9700 . ?

C20 H20B 0.9700 . ?

C11 H11 0.9800 . ?

C11 C12 1.536(3) . ?

C8 C14 1.551(3) . ?

C8 C7 1.509(2) . ?

C14 H14A 0.9700 . ?  
C14 H14B 0.9700 . ?  
C14 C13 1.529(3) . ?  
C5 H5 0.9800 . ?  
C5 C4 1.548(3) . ?  
C5 C6 1.535(3) . ?  
C12 H12A 0.9700 . ?  
C12 H12B 0.9700 . ?  
C12 C13 1.545(3) . ?  
C1 H1A 0.9700 . ?  
C1 H1B 0.9700 . ?  
C1 C2 1.525(3) . ?  
C17 H17A 0.9700 . ?  
C17 H17B 0.9700 . ?  
C17 C21 1.538(3) . ?  
C13 H13 0.9800 . ?  
C4 C3 1.543(3) . ?  
C4 C18 1.529(4) . ?  
C4 C19 1.530(3) . ?  
C21 H21 0.9800 . ?  
C21 C23 1.523(5) . ?  
C21 C22 1.518(4) . ?  
C3 H3A 0.9700 . ?  
C3 H3B 0.9700 . ?  
C3 C2 1.514(4) . ?  
C2 H2A 0.9700 . ?  
C2 H2B 0.9700 . ?  
C18 H18A 0.9600 . ?  
C18 H18B 0.9600 . ?

C18 H18C 0.9600 . ?  
C19 H19A 0.9700 . ?  
C19 H19B 0.9700 . ?  
C23 H23A 0.9600 . ?  
C23 H23B 0.9600 . ?  
C23 H23C 0.9600 . ?  
C22 H22A 0.9600 . ?  
C22 H22B 0.9600 . ?  
C22 H22C 0.9600 . ?

loop\_

\_geom\_angle\_atom\_site\_label\_1  
\_geom\_angle\_atom\_site\_label\_2  
\_geom\_angle\_atom\_site\_label\_3  
\_geom\_angle  
\_geom\_angle\_site\_symmetry\_1  
\_geom\_angle\_site\_symmetry\_3  
\_geom\_angle\_publ\_flag  
C7 O3 C20 118.67(15) . . ?  
C11 O1 H1 109.5 . . ?  
C6 O4 C19 109.33(19) . . ?  
C10 C9 H9 105.8 . . ?  
C10 C9 C8 111.07(12) . . ?  
C11 C9 H9 105.8 . . ?  
C11 C9 C10 116.81(15) . . ?  
C11 C9 C8 110.59(14) . . ?  
C8 C9 H9 105.8 . . ?  
O6 C15 C16 126.5(2) . . ?  
O6 C15 C8 126.26(18) . . ?

C16 C15 C8 107.26(17) . . ?  
C9 C10 C5 108.79(15) . . ?  
C20 C10 C9 106.64(14) . . ?  
C20 C10 C5 111.93(15) . . ?  
C20 C10 C1 108.11(16) . . ?  
C1 C10 C9 113.07(14) . . ?  
C1 C10 C5 108.37(15) . . ?  
C15 C16 H16 106.6 . . ?  
C15 C16 C13 104.12(17) . . ?  
C17 C16 C15 112.93(16) . . ?  
C17 C16 H16 106.6 . . ?  
C17 C16 C13 119.18(17) . . ?  
C13 C16 H16 106.6 . . ?  
O3 C20 C10 111.47(18) . . ?  
O3 C20 H20A 109.3 . . ?  
O3 C20 H20B 109.3 . . ?  
C10 C20 H20A 109.3 . . ?  
C10 C20 H20B 109.3 . . ?  
H20A C20 H20B 108.0 . . ?  
O1 C11 C9 109.95(15) . . ?  
O1 C11 H11 108.7 . . ?  
O1 C11 C12 111.09(18) . . ?  
C9 C11 H11 108.7 . . ?  
C12 C11 C9 109.76(16) . . ?  
C12 C11 H11 108.7 . . ?  
C15 C8 C9 104.39(14) . . ?  
C15 C8 C14 99.73(15) . . ?  
C14 C8 C9 112.52(14) . . ?  
C7 C8 C9 117.51(14) . . ?

C7 C8 C15 112.25(16) . . ?  
C7 C8 C14 108.96(15) . . ?  
C8 C14 H14A 111.7 . . ?  
C8 C14 H14B 111.7 . . ?  
H14A C14 H14B 109.5 . . ?  
C13 C14 C8 100.19(15) . . ?  
C13 C14 H14A 111.7 . . ?  
C13 C14 H14B 111.7 . . ?  
O3 C7 C8 120.37(16) . . ?  
O5 C7 O3 118.72(18) . . ?  
O5 C7 C8 120.78(19) . . ?  
C10 C5 H5 107.5 . . ?  
C4 C5 C10 117.79(14) . . ?  
C4 C5 H5 107.5 . . ?  
C6 C5 C10 115.60(19) . . ?  
C6 C5 H5 107.5 . . ?  
C6 C5 C4 100.23(16) . . ?  
C11 C12 H12A 108.8 . . ?  
C11 C12 H12B 108.8 . . ?  
C11 C12 C13 113.66(15) . . ?  
H12A C12 H12B 107.7 . . ?  
C13 C12 H12A 108.8 . . ?  
C13 C12 H12B 108.8 . . ?  
C10 C1 H1A 109.0 . . ?  
C10 C1 H1B 109.0 . . ?  
H1A C1 H1B 107.8 . . ?  
C2 C1 C10 112.78(18) . . ?  
C2 C1 H1A 109.0 . . ?  
C2 C1 H1B 109.0 . . ?

C16 C17 H17A 109.0 . . ?  
C16 C17 H17B 109.0 . . ?  
C16 C17 C21 113.11(18) . . ?  
H17A C17 H17B 107.8 . . ?  
C21 C17 H17A 109.0 . . ?  
C21 C17 H17B 109.0 . . ?  
C16 C13 H13 110.0 . . ?  
C14 C13 C16 101.84(15) . . ?  
C14 C13 C12 108.59(18) . . ?  
C14 C13 H13 110.0 . . ?  
C12 C13 C16 115.93(17) . . ?  
C12 C13 H13 110.0 . . ?  
C3 C4 C5 109.2(2) . . ?  
C18 C4 C5 118.19(17) . . ?  
C18 C4 C3 111.2(2) . . ?  
C18 C4 C19 109.0(2) . . ?  
C19 C4 C5 98.64(18) . . ?  
C19 C4 C3 109.8(2) . . ?  
C17 C21 H21 107.9 . . ?  
C23 C21 C17 111.2(2) . . ?  
C23 C21 H21 107.9 . . ?  
C22 C21 C17 110.8(2) . . ?  
C22 C21 H21 107.9 . . ?  
C22 C21 C23 110.9(3) . . ?  
C4 C3 H3A 109.1 . . ?  
C4 C3 H3B 109.1 . . ?  
H3A C3 H3B 107.8 . . ?  
C2 C3 C4 112.51(18) . . ?  
C2 C3 H3A 109.1 . . ?

C2 C3 H3B 109.1 . . ?  
C1 C2 H2A 109.3 . . ?  
C1 C2 H2B 109.3 . . ?  
C3 C2 C1 111.50(18) . . ?  
C3 C2 H2A 109.3 . . ?  
C3 C2 H2B 109.3 . . ?  
H2A C2 H2B 108.0 . . ?  
O4 C6 C5 109.6(2) . . ?  
O2 C6 O4 120.4(2) . . ?  
O2 C6 C5 130.1(2) . . ?  
C4 C18 H18A 109.5 . . ?  
C4 C18 H18B 109.5 . . ?  
C4 C18 H18C 109.5 . . ?  
H18A C18 H18B 109.5 . . ?  
H18A C18 H18C 109.5 . . ?  
H18B C18 H18C 109.5 . . ?  
O4 C19 C4 106.2(3) . . ?  
O4 C19 H19A 110.5 . . ?  
O4 C19 H19B 110.5 . . ?  
C4 C19 H19A 110.5 . . ?  
C4 C19 H19B 110.5 . . ?  
H19A C19 H19B 108.7 . . ?  
C21 C23 H23A 109.5 . . ?  
C21 C23 H23B 109.5 . . ?  
C21 C23 H23C 109.5 . . ?  
H23A C23 H23B 109.5 . . ?  
H23A C23 H23C 109.5 . . ?  
H23B C23 H23C 109.5 . . ?  
C21 C22 H22A 109.5 . . ?

C21 C22 H22B 109.5 . . ?  
C21 C22 H22C 109.5 . . ?  
H22A C22 H22B 109.5 . . ?  
H22A C22 H22C 109.5 . . ?  
H22B C22 H22C 109.5 . . ?

\_shelx\_res\_file

;

a.res created by SHELXL-2014/7

TITL a\_a.res in P2(1)2(1)2(1)

REM Old TITL a in P222 #16

REM SHELXT solution in P2(1)2(1)2(1)

REM R1 0.143, Rweak 0.039, Alpha 0.006, Orientation as input

REM Flack x = 0.081 ( 0.065 ) from Parsons' quotients

REM Formula found by SHELXT: C23 N O5

CELL 1.54178 8.016 13.0903 19.9957 90 90 90

ZERR 4 0.0004 0.0006 0.0009 0 0 0

LATT -1

SYMM 0.5-X,-Y,0.5+Z

SYMM -X,0.5+Y,0.5-Z

SYMM 0.5+X,0.5-Y,-Z

SFAC C H O

UNIT 92 128 24

L.S. 4

PLAN 20

SIZE 0.17 0.15 0.18

TEMP 0



BOND \$H

list 4

fmap 2

ACTA

REM <olex2.extras>

REM <HklSrc "%.\\a.hkl">

REM </olex2.extras>

WGHT 0.100000

FVAR 0.70957

O3 3 0.075257 0.548722 0.676801 11.00000 0.04973 0.02945 =

0.05393 0.00156 -0.01424 0.00973

O1 3 -0.041258 0.320335 0.787708 11.00000 0.03737 0.04054 =

0.06633 -0.00328 0.00831 -0.00965

AFIX 147

H1 2 -0.099206 0.268902 0.784820 11.00000 -1.50000

AFIX 0

O6 3 0.534090 0.520102 0.755513 11.00000 0.04694 0.05187 =

0.04581 0.00879 -0.00302 -0.01316

O5 3 0.224180 0.649988 0.739878 11.00000 0.07555 0.02524 =

0.06561 -0.00029 -0.01994 0.00313

O4 3 0.394663 0.424473 0.506859 11.00000 0.09393 0.08982 =

0.03541 0.01623 0.01013 0.00412

O2 3 0.133108 0.466946 0.525927 11.00000 0.08328 0.08958 =

0.05093 0.02493 -0.01962 0.01004

C9 1 0.225684 0.364347 0.737692 11.00000 0.03374 0.02227 =

0.02819 0.00013 -0.00123 -0.00109

AFIX 13

H9 2 0.339988 0.337983 0.735597 11.00000 -1.20000

|      |    |           |          |          |          |          |           |
|------|----|-----------|----------|----------|----------|----------|-----------|
| AFIX | 0  |           |          |          |          |          |           |
| C15  | 1  | 0.423477  | 0.484497 | 0.789136 | 11.00000 | 0.04179  | 0.02796 = |
|      |    | 0.03216   | -0.00187 | -0.00329 | -0.00105 |          |           |
| C10  | 1  | 0.163697  | 0.369205 | 0.664156 | 11.00000 | 0.03344  | 0.02858 = |
|      |    | 0.03198   | -0.00056 | -0.00529 | -0.00075 |          |           |
| C16  | 1  | 0.441352  | 0.437424 | 0.858778 | 11.00000 | 0.04434  | 0.03550 = |
|      |    | 0.02894   | -0.00178 | -0.00347 | 0.00250  |          |           |
| AFIX | 13 |           |          |          |          |          |           |
| H16  | 2  | 0.471148  | 0.493297 | 0.889132 | 11.00000 | -1.20000 |           |
| AFIX | 0  |           |          |          |          |          |           |
| C20  | 1  | 0.018850  | 0.445061 | 0.662815 | 11.00000 | 0.03783  | 0.03490 = |
|      |    | 0.04958   | -0.00040 | -0.01283 | 0.00337  |          |           |
| AFIX | 23 |           |          |          |          |          |           |
| H20A | 2  | -0.033927 | 0.443220 | 0.619178 | 11.00000 | -1.20000 |           |
| H20B | 2  | -0.063595 | 0.425139 | 0.695842 | 11.00000 | -1.20000 |           |
| AFIX | 0  |           |          |          |          |          |           |
| C11  | 1  | 0.130647  | 0.292284 | 0.785240 | 11.00000 | 0.04264  | 0.02732 = |
|      |    | 0.03887   | 0.00249  | 0.00500  | -0.00424 |          |           |
| AFIX | 13 |           |          |          |          |          |           |
| H11  | 2  | 0.139199  | 0.222397 | 0.768005 | 11.00000 | -1.20000 |           |
| AFIX | 0  |           |          |          |          |          |           |
| C8   | 1  | 0.239660  | 0.474776 | 0.768912 | 11.00000 | 0.03928  | 0.02358 = |
|      |    | 0.03135   | -0.00124 | -0.00155 | 0.00066  |          |           |
| C14  | 1  | 0.156712  | 0.482146 | 0.838841 | 11.00000 | 0.04554  | 0.03569 = |
|      |    | 0.03769   | -0.00652 | 0.00348  | 0.00554  |          |           |
| AFIX | 23 |           |          |          |          |          |           |
| H14A | 2  | 0.166773  | 0.550194 | 0.857614 | 11.00000 | -1.20000 |           |
| H14B | 2  | 0.040036  | 0.462619 | 0.837410 | 11.00000 | -1.20000 |           |
| AFIX | 0  |           |          |          |          |          |           |

|      |    |          |          |          |          |          |           |
|------|----|----------|----------|----------|----------|----------|-----------|
| C7   | 1  | 0.181868 | 0.563522 | 0.726680 | 11.00000 | 0.04793  | 0.02444 = |
|      |    | 0.04228  | -0.00098 | -0.00499 | 0.00600  |          |           |
| C5   | 1  | 0.310508 | 0.404202 | 0.618807 | 11.00000 | 0.04092  | 0.03288 = |
|      |    | 0.02811  | 0.00306  | -0.00368 | -0.00164 |          |           |
| AFIX | 13 |          |          |          |          |          |           |
| H5   | 2  | 0.362679 | 0.463455 | 0.640253 | 11.00000 | -1.20000 |           |
| AFIX | 0  |          |          |          |          |          |           |
| C12  | 1  | 0.209885 | 0.295911 | 0.855151 | 11.00000 | 0.05454  | 0.03777 = |
|      |    | 0.03674  | 0.00830  | 0.00639  | -0.00420 |          |           |
| AFIX | 23 |          |          |          |          |          |           |
| H12A | 2  | 0.307605 | 0.252210 | 0.855530 | 11.00000 | -1.20000 |           |
| H12B | 2  | 0.131039 | 0.268633 | 0.887327 | 11.00000 | -1.20000 |           |
| AFIX | 0  |          |          |          |          |          |           |
| C1   | 1  | 0.099267 | 0.265675 | 0.638037 | 11.00000 | 0.04292  | 0.03548 = |
|      |    | 0.04043  | -0.00673 | -0.00712 | -0.00668 |          |           |
| AFIX | 23 |          |          |          |          |          |           |
| H1A  | 2  | 0.016961 | 0.239131 | 0.669063 | 11.00000 | -1.20000 |           |
| H1B  | 2  | 0.044502 | 0.276111 | 0.595322 | 11.00000 | -1.20000 |           |
| AFIX | 0  |          |          |          |          |          |           |
| C17  | 1  | 0.581871 | 0.359430 | 0.862971 | 11.00000 | 0.04773  | 0.04707 = |
|      |    | 0.03530  | 0.00481  | -0.00280 | 0.00965  |          |           |
| AFIX | 23 |          |          |          |          |          |           |
| H17A | 2  | 0.683346 | 0.389915 | 0.845646 | 11.00000 | -1.20000 |           |
| H17B | 2  | 0.554414 | 0.301451 | 0.834839 | 11.00000 | -1.20000 |           |
| AFIX | 0  |          |          |          |          |          |           |
| C13  | 1  | 0.261708 | 0.404422 | 0.877380 | 11.00000 | 0.04807  | 0.03994 = |
|      |    | 0.02723  | -0.00210 | 0.00462  | 0.00243  |          |           |
| AFIX | 13 |          |          |          |          |          |           |
| H13  | 2  | 0.243732 | 0.412517 | 0.925567 | 11.00000 | -1.20000 |           |

|      |     |          |          |          |          |          |           |
|------|-----|----------|----------|----------|----------|----------|-----------|
| AFIX | 0   |          |          |          |          |          |           |
| C4   | 1   | 0.450198 | 0.325868 | 0.603687 | 11.00000 | 0.04438  | 0.04678 = |
|      |     | 0.03452  | -0.00306 | 0.00328  | 0.00406  |          |           |
| C21  | 1   | 0.614096 | 0.321400 | 0.934603 | 11.00000 | 0.05261  | 0.05759 = |
|      |     | 0.03848  | 0.01119  | -0.00097 | 0.00704  |          |           |
| AFIX | 13  |          |          |          |          |          |           |
| H21  | 2   | 0.506038 | 0.314758 | 0.957110 | 11.00000 | -1.20000 |           |
| AFIX | 0   |          |          |          |          |          |           |
| C3   | 1   | 0.370575 | 0.224160 | 0.581303 | 11.00000 | 0.06215  | 0.04548 = |
|      |     | 0.04729  | -0.01401 | 0.00138  | 0.00946  |          |           |
| AFIX | 23  |          |          |          |          |          |           |
| H3A  | 2   | 0.321084 | 0.233129 | 0.537427 | 11.00000 | -1.20000 |           |
| H3B  | 2   | 0.457012 | 0.172621 | 0.577551 | 11.00000 | -1.20000 |           |
| AFIX | 0   |          |          |          |          |          |           |
| C2   | 1   | 0.238036 | 0.187028 | 0.629463 | 11.00000 | 0.06182  | 0.02983 = |
|      |     | 0.05373  | -0.00941 | -0.00278 | 0.00069  |          |           |
| AFIX | 23  |          |          |          |          |          |           |
| H2A  | 2   | 0.288735 | 0.173275 | 0.672581 | 11.00000 | -1.20000 |           |
| H2B  | 2   | 0.190822 | 0.123674 | 0.612886 | 11.00000 | -1.20000 |           |
| AFIX | 0   |          |          |          |          |          |           |
| C6   | 1   | 0.262560 | 0.435728 | 0.547411 | 11.00000 | 0.07099  | 0.05012 = |
|      |     | 0.03333  | 0.01019  | -0.00662 | 0.00028  |          |           |
| C18  | 1   | 0.584131 | 0.308147 | 0.656909 | 11.00000 | 0.04075  | 0.07170 = |
|      |     | 0.05226  | -0.00252 | 0.00074  | 0.01324  |          |           |
| AFIX | 137 |          |          |          |          |          |           |
| H18A | 2   | 0.615289 | 0.372346 | 0.676468 | 11.00000 | -1.50000 |           |
| H18B | 2   | 0.680174 | 0.277150 | 0.636642 | 11.00000 | -1.50000 |           |
| H18C | 2   | 0.540999 | 0.263820 | 0.691026 | 11.00000 | -1.50000 |           |
| AFIX | 0   |          |          |          |          |          |           |

C19 1 0.529340 0.379396 0.543497 11.00000 0.06631 0.07622 =  
0.04783 0.00403 0.01879 0.00018

AFIX 23

H19A 2 0.607161 0.431505 0.558203 11.00000 -1.20000

H19B 2 0.588770 0.330579 0.515850 11.00000 -1.20000

AFIX 0

C23 1 0.718842 0.397645 0.973977 11.00000 0.09327 0.08402 =  
0.05538 0.00224 -0.02847 0.00153

AFIX 137

H23A 2 0.828296 0.401820 0.954685 11.00000 -1.50000

H23B 2 0.727472 0.375517 1.019619 11.00000 -1.50000

H23C 2 0.666762 0.463643 0.972439 11.00000 -1.50000

AFIX 0

C22 1 0.696200 0.216914 0.933838 11.00000 0.11204 0.06732 =  
0.06159 0.02092 -0.00811 0.03322

AFIX 137

H22A 2 0.624394 0.169004 0.911643 11.00000 -1.50000

H22B 2 0.715545 0.194714 0.978934 11.00000 -1.50000

H22C 2 0.800588 0.220943 0.910454 11.00000 -1.50000

AFIX 0

HKLF 4

REM a\_a.res in P2(1)2(1)2(1)

REM R1 = 0.0451 for 4267 Fo > 4sig(Fo) and 0.0479 for all 4524 data

REM 266 parameters refined using 0 restraints

END

WGHT 0.0864 0.1146

REM Highest difference peak 0.336, deepest hole -0.262, 1-sigma level 0.053

|     |   |         |        |        |          |      |      |
|-----|---|---------|--------|--------|----------|------|------|
| Q1  | 1 | 0.1932  | 0.3599 | 0.7016 | 11.00000 | 0.05 | 0.34 |
| Q2  | 1 | 0.4296  | 0.4532 | 0.8231 | 11.00000 | 0.05 | 0.25 |
| Q3  | 1 | 0.2055  | 0.4800 | 0.8022 | 11.00000 | 0.05 | 0.24 |
| Q4  | 1 | 0.2189  | 0.4107 | 0.7490 | 11.00000 | 0.05 | 0.23 |
| Q5  | 1 | 0.2795  | 0.4184 | 0.5862 | 11.00000 | 0.05 | 0.20 |
| Q6  | 1 | 0.6017  | 0.3369 | 0.8984 | 11.00000 | 0.05 | 0.16 |
| Q7  | 1 | 0.4867  | 0.4205 | 0.7148 | 11.00000 | 0.05 | 0.16 |
| Q8  | 1 | 0.1684  | 0.5031 | 0.4757 | 11.00000 | 0.05 | 0.16 |
| Q9  | 1 | 0.0864  | 0.2976 | 0.5846 | 11.00000 | 0.05 | 0.15 |
| Q10 | 1 | 0.4156  | 0.4591 | 0.6939 | 11.00000 | 0.05 | 0.15 |
| Q11 | 1 | 0.5640  | 0.2546 | 0.7516 | 11.00000 | 0.05 | 0.15 |
| Q12 | 1 | 0.4336  | 0.2521 | 0.7740 | 11.00000 | 0.05 | 0.15 |
| Q13 | 1 | 0.5744  | 0.3549 | 0.6915 | 11.00000 | 0.05 | 0.15 |
| Q14 | 1 | -0.0159 | 0.4835 | 0.6074 | 11.00000 | 0.05 | 0.15 |
| Q15 | 1 | 0.0101  | 0.4632 | 0.6076 | 11.00000 | 0.05 | 0.14 |
| Q16 | 1 | 0.0456  | 0.2961 | 0.9025 | 11.00000 | 0.05 | 0.14 |
| Q17 | 1 | 0.2039  | 0.5134 | 0.7510 | 11.00000 | 0.05 | 0.14 |
| Q18 | 1 | 0.1756  | 0.3354 | 0.7613 | 11.00000 | 0.05 | 0.14 |
| Q19 | 1 | 0.6155  | 0.4196 | 0.7004 | 11.00000 | 0.05 | 0.14 |
| Q20 | 1 | 0.4727  | 0.3860 | 0.7720 | 11.00000 | 0.05 | 0.14 |

## Crystal Structure Report for Compound 2

data\_20190801WYXIRX25\_0m\_a

|                              |                 |
|------------------------------|-----------------|
| _audit_creation_method       | 'SHELXL-2018/3' |
| _shelx_SHELXL_version_number | '2018/3'        |
| _chemical_name_systematic    | ?               |
| _chemical_name_common        | ?               |
| _chemical_melting_point      | ?               |
| _chemical_formula_moiety     | ?               |
| _chemical_formula_sum        |                 |
|                              | 'C20 H26 O5'    |
| _chemical_formula_weight     | 346.41          |

loop\_

|                                    |  |
|------------------------------------|--|
| _atom_type_symbol                  |  |
| _atom_type_description             |  |
| _atom_type_scatter_dispersion_real |  |
| _atom_type_scatter_dispersion_imag |  |
| _atom_type_scatter_source          |  |

|     |     |        |        |
|-----|-----|--------|--------|
| 'C' | 'C' | 0.0033 | 0.0016 |
|-----|-----|--------|--------|

'International Tables Vol C Tables 4.2.6.8 and 6.1.1.4'

|     |     |        |        |
|-----|-----|--------|--------|
| 'H' | 'H' | 0.0000 | 0.0000 |
|-----|-----|--------|--------|

'International Tables Vol C Tables 4.2.6.8 and 6.1.1.4'

'O' 'O' 0.0106 0.0060

'International Tables Vol C Tables 4.2.6.8 and 6.1.1.4'

\_space\_group\_crystal\_system monoclinic

\_space\_group\_IT\_number 4

\_space\_group\_name\_H-M\_alt 'P 21'

\_space\_group\_name\_Hall 'P 2yb'

\_shelx\_space\_group\_comment

;

The symmetry employed for this shelxl refinement is uniquely defined by the following loop, which should always be used as a source of symmetry information in preference to the above space-group names. They are only intended as comments.

;

loop\_

\_space\_group\_symop\_operation\_xyz

'x, y, z'

'-x, y+1/2, -z'

\_cell\_length\_a 6.4646(2)

\_cell\_length\_b 21.4751(8)

\_cell\_length\_c 12.3769(5)

\_cell\_angle\_alpha 90

\_cell\_angle\_beta 94.1000(10)

\_cell\_angle\_gamma 90

\_cell\_volume 1713.86(11)

\_cell\_formula\_units\_Z 4



|                               |        |
|-------------------------------|--------|
| _cell_measurement_temperature | 300(2) |
| _cell_measurement_reflns_used | ?      |
| _cell_measurement_theta_min   | ?      |
| _cell_measurement_theta_max   | ?      |

|                                 |            |
|---------------------------------|------------|
| _exptl_crystal_description      | ?          |
| _exptl_crystal_colour           | ?          |
| _exptl_crystal_density_meas     | ?          |
| _exptl_crystal_density_method   | ?          |
| _exptl_crystal_density_diffrn   | 1.343      |
| _exptl_crystal_F_000            | 744        |
| _exptl_transmission_factor_min  | ?          |
| _exptl_transmission_factor_max  | ?          |
| _exptl_crystal_size_max         | ?          |
| _exptl_crystal_size_mid         | ?          |
| _exptl_crystal_size_min         | ?          |
| _exptl_absorpt_coefficient_mu   | 0.095      |
| _shelx_estimated_absorpt_T_min  | ?          |
| _shelx_estimated_absorpt_T_max  | ?          |
| _exptl_absorpt_correction_type  | multi-scan |
| _exptl_absorpt_correction_T_min | 0.7060     |
| _exptl_absorpt_correction_T_max | 0.7473     |
| _exptl_absorpt_process_details  |            |

;

SADABS 2016/2: Krause, L., Herbst-Irmer, R., Sheldrick G.M. & Stalke D.,  
J. Appl. Cryst. 48 (2015) 3-10

;

|                                |        |
|--------------------------------|--------|
| _exptl_absorpt_special_details | ?      |
| _diffrn_ambient_temperature    | 300(2) |

|                                                   |                  |
|---------------------------------------------------|------------------|
| _diffrn_radiation_wavelength                      | 0.71076          |
| _diffrn_radiation_type                            | MoK\alpha        |
| _diffrn_source                                    | ?                |
| _diffrn_measurement_device_type                   | ?                |
| _diffrn_measurement_method                        | ?                |
| _diffrn_detector_area_resol_mean                  | ?                |
| _diffrn_reflns_number                             | 57561            |
| _diffrn_reflns_av_unetI/netI                      | 0.0378           |
| _diffrn_reflns_av_R_equivalents                   | 0.0358           |
| _diffrn_reflns_limit_h_min                        | -10              |
| _diffrn_reflns_limit_h_max                        | 10               |
| _diffrn_reflns_limit_k_min                        | -36              |
| _diffrn_reflns_limit_k_max                        | 36               |
| _diffrn_reflns_limit_l_min                        | -20              |
| _diffrn_reflns_limit_l_max                        | 20               |
| _diffrn_reflns_theta_min                          | 3.159            |
| _diffrn_reflns_theta_max                          | 37.058           |
| _diffrn_reflns_theta_full                         | 25.243           |
| _diffrn_measured_fraction_theta_max               | 0.997            |
| _diffrn_measured_fraction_theta_full              | 0.993            |
| _diffrn_reflns_Laue_measured_fraction_max         | 0.997            |
| _diffrn_reflns_Laue_measured_fraction_full        | 0.993            |
| _diffrn_reflns_point_group_measured_fraction_max  | 0.994            |
| _diffrn_reflns_point_group_measured_fraction_full | 0.993            |
| _reflns_number_total                              | 17341            |
| _reflns_number_gt                                 | 11735            |
| _reflns_threshold_expression                      | 'I > 2\sigma(I)' |
| _reflns_Friedel_coverage                          | 0.954            |
| _reflns_Friedel_fraction_max                      | 0.991            |

\_reflns\_Friedel\_fraction\_full      0.993

\_reflns\_special\_details

;

Reflections were merged by SHELXL according to the crystal class for the calculation of statistics and refinement.

\_reflns\_Friedel\_fraction is defined as the number of unique Friedel pairs measured divided by the number that would be possible theoretically, ignoring centric projections and systematic absences.

;

\_computing\_data\_collection      ?

\_computing\_cell\_refinement      ?

\_computing\_data\_reduction      ?

\_computing\_structure\_solution      'SHELXT 2014/5 (Sheldrick, 2014)'

\_computing\_structure\_refinement 'SHELXL-2018/3 (Sheldrick, 2018)'

\_computing\_molecular\_graphics      ?

\_computing\_publication\_material      ?

\_refine\_special\_details      ?

\_refine\_ls\_structure\_factor\_coef      Fsqd

\_refine\_ls\_matrix\_type      full

\_refine\_ls\_weighting\_scheme      calc

\_refine\_ls\_weighting\_details

'w=1/[\s^2^(Fo^2^)+(0.0642P)^2^+0.0285P] where P=(Fo^2^+2Fc^2^)/3'

\_atom\_sites\_solution\_primary      ?

\_atom\_sites\_solution\_secondary      ?

\_atom\_sites\_solution\_hydrogens      geom

\_refine\_ls\_hydrogen\_treatment mixed  
\_refine\_ls\_extinction\_method none  
\_refine\_ls\_extinction\_coef .  
\_refine\_ls\_abs\_structure\_details

;

Flack x determined using 4495 quotients  $[(I^+)-(I^-)]/[(I^+)+(I^-)]$   
(Parsons, Flack and Wagner, Acta Cryst. B69 (2013) 249-259).

;

\_refine\_ls\_abs\_structure\_Flack -0.09(16)  
\_chemical\_absolute\_configuration ?  
\_refine\_ls\_number\_reflns 17341  
\_refine\_ls\_number\_parameters 456  
\_refine\_ls\_number\_restraints 1  
\_refine\_ls\_R\_factor\_all 0.0813  
\_refine\_ls\_R\_factor\_gt 0.0466  
\_refine\_ls\_wR\_factor\_ref 0.1242  
\_refine\_ls\_wR\_factor\_gt 0.1086  
\_refine\_ls\_goodness\_of\_fit\_ref 1.018  
\_refine\_ls\_restrained\_S\_all 1.018  
\_refine\_ls\_shift/su\_max 0.001  
\_refine\_ls\_shift/su\_mean 0.000

loop\_

\_atom\_site\_label  
\_atom\_site\_type\_symbol  
\_atom\_site\_fract\_x  
\_atom\_site\_fract\_y  
\_atom\_site\_fract\_z  
\_atom\_site\_U\_iso\_or\_equiv

\_atom\_site\_adp\_type

\_atom\_site\_occupancy

\_atom\_site\_site\_symmetry\_order

\_atom\_site\_calc\_flag

\_atom\_site\_refinement\_flags\_posn

\_atom\_site\_refinement\_flags\_adp

\_atom\_site\_refinement\_flags\_occupancy

\_atom\_site\_disorder\_assembly

\_atom\_site\_disorder\_group

O1 O -0.0372(2) 0.38817(6) 0.23593(9) 0.0462(3) Uani 1 1 d . . . . .  
C1 C -0.1750(3) 0.39256(9) -0.05779(14) 0.0410(3) Uani 1 1 d . . . . .  
H1A H -0.090981 0.386557 -0.118817 0.049 Uiso 1 1 calc R U . . .  
H1AB H -0.285972 0.362070 -0.063575 0.049 Uiso 1 1 calc R U . . .  
O2 O -0.2733(2) 0.31873(7) 0.16099(12) 0.0498(3) Uani 1 1 d . . . . .  
C2 C -0.2691(4) 0.45773(11) -0.06413(17) 0.0557(5) Uani 1 1 d . . . . .  
H2A H -0.350489 0.462602 -0.132550 0.067 Uiso 1 1 calc R U . . .  
H2AB H -0.361049 0.463054 -0.006216 0.067 Uiso 1 1 calc R U . . .  
O3 O -0.3011(2) 0.21873(7) 0.15082(13) 0.0516(3) Uani 1 1 d . . . . .  
C3 C -0.1017(4) 0.50690(9) -0.05463(16) 0.0541(5) Uani 1 1 d . . . . .  
H3A H -0.166421 0.547642 -0.059884 0.065 Uiso 1 1 calc R U . . .  
H3AB H -0.015280 0.502590 -0.115097 0.065 Uiso 1 1 calc R U . . .  
O4 O 0.2536(2) 0.21498(7) 0.17380(9) 0.0432(3) Uani 1 1 d . . . . .  
H4 H 0.369(5) 0.2186(14) 0.1543(8) 0.065 Uiso 1 1 calc R U . . .  
C4 C 0.0360(3) 0.50349(7) 0.05091(14) 0.0404(3) Uani 1 1 d . . . . .  
O5 O 0.0324(3) 0.49479(7) 0.23976(11) 0.0506(3) Uani 1 1 d . . . . .  
C5 C 0.1025(2) 0.43620(7) 0.08362(12) 0.0308(3) Uani 1 1 d . . . . .  
H5 H 0.243347 0.428261 0.062575 0.037 Uiso 1 1 calc R U . . .  
C6 C 0.1006(3) 0.43555(8) 0.20852(13) 0.0383(3) Uani 1 1 d . . . . .  
H6 H 0.240154 0.427226 0.241601 0.046 Uiso 1 1 calc R U . . .

C7 C -0.2060(2) 0.26404(8) 0.12566(12) 0.0353(3) Uani 1 1 d . . . . .  
C8 C -0.0306(2) 0.26095(7) 0.05123(11) 0.0286(2) Uani 1 1 d . . . . .  
C9 C 0.09464(19) 0.32160(6) 0.04707(10) 0.0249(2) Uani 1 1 d . . . . .  
H9 H 0.180382 0.322867 0.115607 0.030 Uiso 1 1 calc R U . . .  
C10 C -0.0409(2) 0.38108(7) 0.04721(11) 0.0276(2) Uani 1 1 d . . . . .  
C12 C 0.1897(3) 0.28024(8) -0.14346(13) 0.0388(3) Uani 1 1 d . . . . .  
H12A H 0.097553 0.304162 -0.192905 0.047 Uiso 1 1 calc R U . . .  
H12B H 0.312983 0.270231 -0.180236 0.047 Uiso 1 1 calc R U . . .  
C11 C 0.2507(2) 0.31966(8) -0.04219(12) 0.0326(3) Uani 1 1 d . . . . .  
H11A H 0.274063 0.362048 -0.065503 0.039 Uiso 1 1 calc R U . . .  
H11B H 0.381726 0.304038 -0.009951 0.039 Uiso 1 1 calc R U . . .  
C13 C 0.0818(3) 0.22008(8) -0.11324(13) 0.0380(3) Uani 1 1 d . . . . .  
H13 H 0.054951 0.192676 -0.175989 0.046 Uiso 1 1 calc R U . . .  
C14 C -0.1180(3) 0.23752(8) -0.06143(13) 0.0365(3) Uani 1 1 d . . . . .  
H14A H -0.207779 0.201707 -0.055198 0.044 Uiso 1 1 calc R U . . .  
H14B H -0.193201 0.270067 -0.101886 0.044 Uiso 1 1 calc R U . . .  
C15 C 0.1138(2) 0.20458(7) 0.08336(12) 0.0335(3) Uani 1 1 d . . . . .  
H15 H 0.024119 0.169921 0.101626 0.040 Uiso 1 1 calc R U . . .  
C16 C 0.2072(3) 0.18767(7) -0.02171(13) 0.0353(3) Uani 1 1 d . . . . .  
C17 C 0.3726(3) 0.15253(9) -0.03023(17) 0.0454(4) Uani 1 1 d . . . . .  
H17A H 0.422869 0.145669 -0.097758 0.055 Uiso 1 1 calc R U . . .  
H17B H 0.438881 0.134623 0.031296 0.055 Uiso 1 1 calc R U . . .  
C18 C 0.2303(4) 0.54336(9) 0.0434(2) 0.0628(6) Uani 1 1 d . . . . .  
H18A H 0.309812 0.527670 -0.013332 0.094 Uiso 1 1 calc R U . . .  
H18B H 0.312569 0.541789 0.111033 0.094 Uiso 1 1 calc R U . . .  
H18C H 0.190630 0.585658 0.027653 0.094 Uiso 1 1 calc R U . . .  
C19 C -0.0761(3) 0.52468(9) 0.14936(15) 0.0461(4) Uani 1 1 d . . . . .  
H19A H -0.069790 0.569606 0.157061 0.055 Uiso 1 1 calc R U . . .  
H19B H -0.220381 0.511907 0.142672 0.055 Uiso 1 1 calc R U . . .

C20 C -0.1733(3) 0.37657(8) 0.14455(14) 0.0379(3) Uani 1 1 d . . . . .  
H20 H -0.278376 0.409527 0.138831 0.046 Uiso 1 1 calc R U . . .  
C1\_1 C 0.7001(3) 0.68442(10) 0.55496(16) 0.0464(4) Uani 1 1 d . . . . .  
H1A\_1 H 0.668846 0.676647 0.629261 0.056 Uiso 1 1 calc R U . . .  
H1AB\_1 H 0.795605 0.652342 0.534666 0.056 Uiso 1 1 calc R U . . .  
O1\_1 O 0.3708(3) 0.69379(8) 0.30023(10) 0.0570(4) Uani 1 1 d . . . . .  
C2\_1 C 0.8066(3) 0.74738(13) 0.5494(2) 0.0568(5) Uani 1 1 d . . . . .  
H2A\_1 H 0.927276 0.748086 0.600740 0.068 Uiso 1 1 calc R U . . .  
H2AB\_1 H 0.853788 0.753261 0.477494 0.068 Uiso 1 1 calc R U . . .  
O2\_1 O 0.5851(3) 0.61058(8) 0.32462(11) 0.0557(4) Uani 1 1 d . . . . .  
C3\_1 C 0.6635(4) 0.80004(11) 0.57461(18) 0.0546(5) Uani 1 1 d . . . . .  
H3A\_1 H 0.737833 0.839080 0.570172 0.065 Uiso 1 1 calc R U . . .  
H3AB\_1 H 0.624623 0.795456 0.648452 0.065 Uiso 1 1 calc R U . . .  
O3\_1 O 0.5223(3) 0.51119(8) 0.31487(13) 0.0594(4) Uani 1 1 d . . . . .  
C4\_1 C 0.4666(3) 0.80312(9) 0.49886(14) 0.0435(4) Uani 1 1 d . . . . .  
O4\_1 O 0.0431(2) 0.53472(8) 0.45117(11) 0.0490(3) Uani 1 1 d . . . . .  
H4\_1 H 0.012091 0.523513 0.388769 0.074 Uiso 1 1 calc R U . . .  
C5\_1 C 0.3649(3) 0.73897(8) 0.47610(12) 0.0353(3) Uani 1 1 d . . . . .  
H5\_1 H 0.248497 0.733842 0.521912 0.042 Uiso 1 1 calc R U . . .  
O5\_1 O 0.3371(3) 0.80133(8) 0.31643(13) 0.0665(5) Uani 1 1 d . . . . .  
C6\_1 C 0.2805(3) 0.74293(10) 0.35606(15) 0.0476(4) Uani 1 1 d . . . . .  
H6\_1 H 0.129218 0.738681 0.350595 0.057 Uiso 1 1 calc R U . . .  
C7\_1 C 0.5066(3) 0.55795(9) 0.36600(14) 0.0423(4) Uani 1 1 d . . . . .  
C8\_1 C 0.4229(2) 0.56001(8) 0.47695(12) 0.0354(3) Uani 1 1 d . . . . .  
C9\_1 C 0.3526(2) 0.62514(7) 0.51032(11) 0.0323(3) Uani 1 1 d . . . . .  
H9\_1 H 0.223002 0.632712 0.466263 0.039 Uiso 1 1 calc R U . . .  
C10\_1 C 0.4985(2) 0.67894(8) 0.48164(11) 0.0339(3) Uani 1 1 d . . . . .  
C11\_1 C 0.2909(3) 0.62560(9) 0.62927(12) 0.0423(4) Uani 1 1 d . . . . .  
H11A\_1 H 0.304470 0.667851 0.656576 0.051 Uiso 1 1 calc R U . . .

H11B\_1 H 0.145668 0.614233 0.629322 0.051 Uiso 1 1 calc R U . . .  
C12\_1 C 0.4157(4) 0.58248(10) 0.70800(14) 0.0546(5) Uani 1 1 d . . . . .  
H12A\_1 H 0.340347 0.576144 0.772110 0.065 Uiso 1 1 calc R U . . .  
H12B\_1 H 0.547357 0.601920 0.730306 0.065 Uiso 1 1 calc R U . . .  
C13\_1 C 0.4552(4) 0.51932(10) 0.65529(16) 0.0549(5) Uani 1 1 d . . . . .  
H13\_1 H 0.522711 0.490025 0.707300 0.066 Uiso 1 1 calc R U . . .  
C14\_1 C 0.5853(3) 0.53033(10) 0.55913(17) 0.0494(4) Uani 1 1 d . . . . .  
H14A\_1 H 0.638753 0.491596 0.531977 0.059 Uiso 1 1 calc R U . . .  
H14B\_1 H 0.699696 0.558510 0.577517 0.059 Uiso 1 1 calc R U . . .  
C15\_1 C 0.2421(3) 0.51231(8) 0.48458(14) 0.0406(3) Uani 1 1 d . . . . .  
H15\_1 H 0.271123 0.475826 0.440559 0.049 Uiso 1 1 calc R U . . .  
C16\_1 C 0.2574(4) 0.49306(9) 0.60296(15) 0.0492(4) Uani 1 1 d . . . . .  
C17\_1 C 0.1174(5) 0.45913(13) 0.6492(2) 0.0674(6) Uani 1 1 d . . . . .  
H17A\_1 H 0.136544 0.449129 0.722293 0.081 Uiso 1 1 calc R U . . .  
H17B\_1 H -0.000236 0.445289 0.608484 0.081 Uiso 1 1 calc R U . . .  
C18\_1 C 0.3092(4) 0.84631(10) 0.5474(2) 0.0580(5) Uani 1 1 d . . . . .  
H18A\_1 H 0.371423 0.886321 0.561767 0.087 Uiso 1 1 calc R U . . .  
H18B\_1 H 0.267351 0.828738 0.613745 0.087 Uiso 1 1 calc R U . . .  
H18C\_1 H 0.190073 0.850948 0.497117 0.087 Uiso 1 1 calc R U . . .  
C19\_1 C 0.5051(4) 0.82555(11) 0.38483(17) 0.0587(5) Uani 1 1 d . . . . .  
H19A\_1 H 0.506970 0.870682 0.381894 0.070 Uiso 1 1 calc R U . . .  
H19B\_1 H 0.636539 0.809921 0.362920 0.070 Uiso 1 1 calc R U . . .  
C20\_1 C 0.5459(3) 0.67154(9) 0.36283(14) 0.0445(4) Uani 1 1 d . . . . .  
H20\_1 H 0.664683 0.698035 0.349252 0.053 Uiso 1 1 calc R U . . .

loop\_

\_atom\_site\_aniso\_label  
\_atom\_site\_aniso\_U\_11  
\_atom\_site\_aniso\_U\_22



\_atom\_site\_aniso\_U\_33

\_atom\_site\_aniso\_U\_23

\_atom\_site\_aniso\_U\_13

\_atom\_site\_aniso\_U\_12

O1 0.0659(8) 0.0484(7) 0.0250(5) 0.0008(5) 0.0082(5) -0.0041(6)  
C1 0.0442(8) 0.0452(8) 0.0320(7) 0.0002(6) -0.0084(6) 0.0072(7)  
O2 0.0441(6) 0.0519(7) 0.0568(7) -0.0016(6) 0.0277(6) -0.0086(6)  
C2 0.0616(12) 0.0618(12) 0.0413(9) 0.0043(8) -0.0125(8) 0.0271(10)  
O3 0.0450(7) 0.0547(8) 0.0566(8) 0.0131(6) 0.0130(6) -0.0158(6)  
C3 0.0854(15) 0.0413(9) 0.0360(8) 0.0085(7) 0.0068(9) 0.0219(10)  
O4 0.0426(6) 0.0576(7) 0.0287(5) 0.0052(5) -0.0025(4) 0.0077(6)  
C4 0.0539(9) 0.0282(7) 0.0401(8) 0.0023(6) 0.0107(7) 0.0086(6)  
O5 0.0730(9) 0.0434(7) 0.0345(6) -0.0101(5) -0.0033(6) 0.0138(6)  
C5 0.0344(6) 0.0269(6) 0.0314(6) 0.0001(5) 0.0043(5) 0.0017(5)  
C6 0.0474(8) 0.0353(7) 0.0311(7) -0.0052(6) -0.0032(6) 0.0045(6)  
C7 0.0299(6) 0.0450(8) 0.0308(6) 0.0074(6) 0.0021(5) -0.0082(6)  
C8 0.0282(6) 0.0320(6) 0.0256(5) 0.0033(5) 0.0012(4) -0.0053(5)  
C9 0.0248(5) 0.0282(5) 0.0217(5) 0.0020(4) 0.0021(4) -0.0025(5)  
C10 0.0280(6) 0.0314(6) 0.0238(5) 0.0023(5) 0.0031(4) 0.0004(5)  
C12 0.0514(9) 0.0388(8) 0.0275(6) 0.0010(6) 0.0110(6) 0.0009(7)  
C11 0.0339(6) 0.0321(6) 0.0332(6) 0.0000(5) 0.0114(5) -0.0041(6)  
C13 0.0506(9) 0.0353(7) 0.0276(6) -0.0049(5) -0.0009(6) -0.0031(6)  
C14 0.0396(7) 0.0371(7) 0.0317(6) 0.0000(6) -0.0061(5) -0.0082(6)  
C15 0.0376(7) 0.0309(6) 0.0318(6) 0.0057(5) 0.0010(5) -0.0039(5)  
C16 0.0426(7) 0.0290(6) 0.0339(7) -0.0020(5) -0.0001(6) -0.0043(6)  
C17 0.0499(9) 0.0395(8) 0.0467(9) -0.0067(7) 0.0022(7) 0.0019(7)  
C18 0.0719(14) 0.0301(8) 0.0893(17) 0.0047(9) 0.0258(13) -0.0019(8)  
C19 0.0601(10) 0.0397(8) 0.0387(8) -0.0035(7) 0.0047(7) 0.0159(8)  
C20 0.0382(7) 0.0411(8) 0.0360(7) 0.0005(6) 0.0132(6) 0.0012(6)

C1\_1 0.0370(7) 0.0583(10) 0.0429(9) -0.0033(8) -0.0028(7) 0.0019(8)  
O1\_1 0.0813(10) 0.0616(9) 0.0270(5) -0.0050(5) -0.0038(6) 0.0097(8)  
C2\_1 0.0396(9) 0.0700(13) 0.0600(12) -0.0074(10) -0.0017(8) -0.0118(9)  
O2\_1 0.0744(10) 0.0574(8) 0.0387(6) -0.0084(6) 0.0263(7) 0.0059(7)  
C3\_1 0.0594(11) 0.0585(11) 0.0460(10) -0.0110(9) 0.0049(9) -0.0164(9)  
O3\_1 0.0626(9) 0.0637(9) 0.0543(8) -0.0260(7) 0.0202(7) 0.0015(7)  
C4\_1 0.0544(9) 0.0429(9) 0.0345(7) -0.0023(6) 0.0117(7) -0.0063(7)  
O4\_1 0.0419(6) 0.0657(9) 0.0392(6) -0.0133(6) 0.0009(5) -0.0004(6)  
C5\_1 0.0383(7) 0.0401(7) 0.0277(6) 0.0001(6) 0.0038(5) 0.0009(6)  
O5\_1 0.1024(13) 0.0534(8) 0.0421(7) 0.0134(6) -0.0068(8) -0.0029(9)  
C6\_1 0.0580(10) 0.0494(10) 0.0344(8) 0.0041(7) -0.0050(7) 0.0030(8)  
C7\_1 0.0374(7) 0.0559(10) 0.0340(7) -0.0123(7) 0.0056(6) 0.0065(7)  
C8\_1 0.0370(7) 0.0413(8) 0.0278(6) -0.0061(6) 0.0010(5) 0.0069(6)  
C9\_1 0.0357(7) 0.0395(7) 0.0220(5) -0.0034(5) 0.0034(5) 0.0044(6)  
C10\_1 0.0353(6) 0.0438(8) 0.0229(5) -0.0035(5) 0.0040(5) 0.0023(6)  
C11\_1 0.0594(10) 0.0424(8) 0.0261(6) -0.0038(6) 0.0110(7) 0.0023(7)  
C12\_1 0.0833(14) 0.0537(11) 0.0257(7) 0.0005(7) -0.0030(8) -0.0016(10)  
C13\_1 0.0765(14) 0.0490(10) 0.0370(8) 0.0058(8) -0.0114(9) 0.0083(10)  
C14\_1 0.0511(9) 0.0478(10) 0.0475(9) -0.0025(8) -0.0091(8) 0.0145(8)  
C15\_1 0.0482(8) 0.0414(8) 0.0324(7) -0.0091(6) 0.0042(6) 0.0020(7)  
C16\_1 0.0700(12) 0.0390(8) 0.0389(8) -0.0010(7) 0.0064(8) 0.0045(8)  
C17\_1 0.0896(18) 0.0575(13) 0.0569(13) 0.0054(10) 0.0180(12) -0.0035(12)  
C18\_1 0.0784(15) 0.0396(9) 0.0582(12) -0.0044(8) 0.0203(11) 0.0031(9)  
C19\_1 0.0841(15) 0.0526(11) 0.0411(9) 0.0036(9) 0.0154(9) -0.0147(11)  
C20\_1 0.0542(9) 0.0507(10) 0.0300(7) -0.0021(7) 0.0119(7) 0.0003(8)

\_geom\_special\_details

;

All esds (except the esd in the dihedral angle between two l.s. planes)

are estimated using the full covariance matrix. The cell esds are taken into account individually in the estimation of esds in distances, angles and torsion angles; correlations between esds in cell parameters are only used when they are defined by crystal symmetry. An approximate (isotropic) treatment of cell esds is used for estimating esds involving l.s. planes.

;

loop\_

\_geom\_bond\_atom\_site\_label\_1

\_geom\_bond\_atom\_site\_label\_2

\_geom\_bond\_distance

\_geom\_bond\_site\_symmetry\_2

\_geom\_bond\_publ\_flag

O1 C20 1.405(2) . ?

O1 C6 1.410(2) . ?

C1 C2 1.526(3) . ?

C1 C10 1.530(2) . ?

C1 H1A 0.9700 . ?

C1 H1AB 0.9700 . ?

O2 C7 1.337(2) . ?

O2 C20 1.422(2) . ?

C2 C3 1.511(4) . ?

C2 H2A 0.9700 . ?

C2 H2AB 0.9700 . ?

O3 C7 1.204(2) . ?

C3 C4 1.529(3) . ?

C3 H3A 0.9700 . ?

C3 H3AB 0.9700 . ?

O4 C15 1.405(2) . ?

O4 H4 0.80(3) . ?  
C4 C18 1.529(3) . ?  
C4 C19 1.531(2) . ?  
C4 C5 1.553(2) . ?  
O5 C6 1.409(2) . ?  
O5 C19 1.430(2) . ?  
C5 C6 1.547(2) . ?  
C5 C10 1.550(2) . ?  
C5 H5 0.9800 . ?  
C6 H6 0.9800 . ?  
C7 C8 1.513(2) . ?  
C8 C9 1.5365(19) . ?  
C8 C14 1.550(2) . ?  
C8 C15 1.563(2) . ?  
C9 C11 1.5490(18) . ?  
C9 C10 1.5490(19) . ?  
C9 H9 0.9800 . ?  
C10 C20 1.530(2) . ?  
C12 C13 1.527(2) . ?  
C12 C11 1.540(2) . ?  
C12 H12A 0.9700 . ?  
C12 H12B 0.9700 . ?  
C11 H11A 0.9700 . ?  
C11 H11B 0.9700 . ?  
C13 C16 1.514(2) . ?  
C13 C14 1.529(2) . ?  
C13 H13 0.9800 . ?  
C14 H14A 0.9700 . ?  
C14 H14B 0.9700 . ?

C15 C16 1.516(2) . ?  
C15 H15 0.9800 . ?  
C16 C17 1.319(3) . ?  
C17 H17A 0.9300 . ?  
C17 H17B 0.9300 . ?  
C18 H18A 0.9600 . ?  
C18 H18B 0.9600 . ?  
C18 H18C 0.9600 . ?  
C19 H19A 0.9700 . ?  
C19 H19B 0.9700 . ?  
C20 H20 0.9800 . ?  
C1\_1 C2\_1 1.521(3) . ?  
C1\_1 C10\_1 1.538(2) . ?  
C1\_1 H1A\_1 0.9700 . ?  
C1\_1 H1AB\_1 0.9700 . ?  
O1\_1 C20\_1 1.409(3) . ?  
O1\_1 C6\_1 1.410(3) . ?  
C2\_1 C3\_1 1.508(3) . ?  
C2\_1 H2A\_1 0.9700 . ?  
C2\_1 H2AB\_1 0.9700 . ?  
O2\_1 C7\_1 1.354(3) . ?  
O2\_1 C20\_1 1.421(2) . ?  
C3\_1 C4\_1 1.527(3) . ?  
C3\_1 H3A\_1 0.9700 . ?  
C3\_1 H3AB\_1 0.9700 . ?  
O3\_1 C7\_1 1.195(2) . ?  
C4\_1 C19\_1 1.528(3) . ?  
C4\_1 C18\_1 1.531(3) . ?  
C4\_1 C5\_1 1.544(2) . ?

O4\_1 C15\_1 1.408(2) . ?  
O4\_1 H4\_1 0.8200 . ?  
C5\_1 C6\_1 1.548(2) . ?  
C5\_1 C10\_1 1.551(2) . ?  
C5\_1 H5\_1 0.9800 . ?  
O5\_1 C6\_1 1.405(3) . ?  
O5\_1 C19\_1 1.427(3) . ?  
C6\_1 H6\_1 0.9800 . ?  
C7\_1 C8\_1 1.512(2) . ?  
C8\_1 C9\_1 1.536(2) . ?  
C8\_1 C14\_1 1.546(2) . ?  
C8\_1 C15\_1 1.562(3) . ?  
C9\_1 C10\_1 1.549(2) . ?  
C9\_1 C11\_1 1.553(2) . ?  
C9\_1 H9\_1 0.9800 . ?  
C10\_1 C20\_1 1.532(2) . ?  
C11\_1 C12\_1 1.532(3) . ?  
C11\_1 H11A\_1 0.9700 . ?  
C11\_1 H11B\_1 0.9700 . ?  
C12\_1 C13\_1 1.534(3) . ?  
C12\_1 H12A\_1 0.9700 . ?  
C12\_1 H12B\_1 0.9700 . ?  
C13\_1 C16\_1 1.502(3) . ?  
C13\_1 C14\_1 1.524(3) . ?  
C13\_1 H13\_1 0.9800 . ?  
C14\_1 H14A\_1 0.9700 . ?  
C14\_1 H14B\_1 0.9700 . ?  
C15\_1 C16\_1 1.519(3) . ?  
C15\_1 H15\_1 0.9800 . ?

C16\_1 C17\_1 1.323(3) . ?  
C17\_1 H17A\_1 0.9300 . ?  
C17\_1 H17B\_1 0.9300 . ?  
C18\_1 H18A\_1 0.9600 . ?  
C18\_1 H18B\_1 0.9600 . ?  
C18\_1 H18C\_1 0.9600 . ?  
C19\_1 H19A\_1 0.9700 . ?  
C19\_1 H19B\_1 0.9700 . ?  
C20\_1 H20\_1 0.9800 . ?

loop\_

\_geom\_angle\_atom\_site\_label\_1  
\_geom\_angle\_atom\_site\_label\_2  
\_geom\_angle\_atom\_site\_label\_3  
\_geom\_angle  
\_geom\_angle\_site\_symmetry\_1  
\_geom\_angle\_site\_symmetry\_3  
\_geom\_angle\_publ\_flag  
C20 O1 C6 107.73(12) . . ?  
C2 C1 C10 113.02(14) . . ?  
C2 C1 H1A 109.0 . . ?  
C10 C1 H1A 109.0 . . ?  
C2 C1 H1AB 109.0 . . ?  
C10 C1 H1AB 109.0 . . ?  
H1A C1 H1AB 107.8 . . ?  
C7 O2 C20 123.96(11) . . ?  
C3 C2 C1 110.87(17) . . ?  
C3 C2 H2A 109.5 . . ?  
C1 C2 H2A 109.5 . . ?

C3 C2 H2AB 109.5 . . ?  
C1 C2 H2AB 109.5 . . ?  
H2A C2 H2AB 108.1 . . ?  
C2 C3 C4 113.78(16) . . ?  
C2 C3 H3A 108.8 . . ?  
C4 C3 H3A 108.8 . . ?  
C2 C3 H3AB 108.8 . . ?  
C4 C3 H3AB 108.8 . . ?  
H3A C3 H3AB 107.7 . . ?  
C15 O4 H4 109.5 . . ?  
C18 C4 C3 110.60(17) . . ?  
C18 C4 C19 108.66(17) . . ?  
C3 C4 C19 112.71(16) . . ?  
C18 C4 C5 108.88(15) . . ?  
C3 C4 C5 113.61(14) . . ?  
C19 C4 C5 101.95(13) . . ?  
C6 O5 C19 109.65(12) . . ?  
C6 C5 C10 103.68(12) . . ?  
C6 C5 C4 104.30(12) . . ?  
C10 C5 C4 119.08(13) . . ?  
C6 C5 H5 109.7 . . ?  
C10 C5 H5 109.7 . . ?  
C4 C5 H5 109.7 . . ?  
O5 C6 O1 111.71(14) . . ?  
O5 C6 C5 106.91(13) . . ?  
O1 C6 C5 107.28(12) . . ?  
O5 C6 H6 110.3 . . ?  
O1 C6 H6 110.3 . . ?  
C5 C6 H6 110.3 . . ?



O3 C7 O2 116.17(14) . . ?  
O3 C7 C8 122.76(16) . . ?  
O2 C7 C8 120.90(13) . . ?  
C7 C8 C9 113.76(12) . . ?  
C7 C8 C14 108.74(12) . . ?  
C9 C8 C14 113.82(11) . . ?  
C7 C8 C15 109.83(12) . . ?  
C9 C8 C15 111.01(11) . . ?  
C14 C8 C15 98.64(12) . . ?  
C8 C9 C11 111.88(11) . . ?  
C8 C9 C10 113.55(10) . . ?  
C11 C9 C10 114.86(11) . . ?  
C8 C9 H9 105.1 . . ?  
C11 C9 H9 105.1 . . ?  
C10 C9 H9 105.1 . . ?  
C1 C10 C20 111.36(13) . . ?  
C1 C10 C9 114.71(12) . . ?  
C20 C10 C9 107.28(11) . . ?  
C1 C10 C5 114.50(12) . . ?  
C20 C10 C5 100.13(12) . . ?  
C9 C10 C5 107.66(11) . . ?  
C13 C12 C11 111.13(12) . . ?  
C13 C12 H12A 109.4 . . ?  
C11 C12 H12A 109.4 . . ?  
C13 C12 H12B 109.4 . . ?  
C11 C12 H12B 109.4 . . ?  
H12A C12 H12B 108.0 . . ?  
C12 C11 C9 116.94(12) . . ?  
C12 C11 H11A 108.1 . . ?

C9 C11 H11A 108.1 . . ?  
C12 C11 H11B 108.1 . . ?  
C9 C11 H11B 108.1 . . ?  
H11A C11 H11B 107.3 . . ?  
C16 C13 C12 110.05(14) . . ?  
C16 C13 C14 102.81(13) . . ?  
C12 C13 C14 108.03(13) . . ?  
C16 C13 H13 111.8 . . ?  
C12 C13 H13 111.8 . . ?  
C14 C13 H13 111.8 . . ?  
C13 C14 C8 101.08(12) . . ?  
C13 C14 H14A 111.6 . . ?  
C8 C14 H14A 111.6 . . ?  
C13 C14 H14B 111.6 . . ?  
C8 C14 H14B 111.6 . . ?  
H14A C14 H14B 109.4 . . ?  
O4 C15 C16 116.65(13) . . ?  
O4 C15 C8 114.72(13) . . ?  
C16 C15 C8 103.56(12) . . ?  
O4 C15 H15 107.1 . . ?  
C16 C15 H15 107.1 . . ?  
C8 C15 H15 107.1 . . ?  
C17 C16 C13 126.63(16) . . ?  
C17 C16 C15 125.46(16) . . ?  
C13 C16 C15 107.88(13) . . ?  
C16 C17 H17A 120.0 . . ?  
C16 C17 H17B 120.0 . . ?  
H17A C17 H17B 120.0 . . ?  
C4 C18 H18A 109.5 . . ?

C4 C18 H18B 109.5 . . ?  
H18A C18 H18B 109.5 . . ?  
C4 C18 H18C 109.5 . . ?  
H18A C18 H18C 109.5 . . ?  
H18B C18 H18C 109.5 . . ?  
O5 C19 C4 104.82(14) . . ?  
O5 C19 H19A 110.8 . . ?  
C4 C19 H19A 110.8 . . ?  
O5 C19 H19B 110.8 . . ?  
C4 C19 H19B 110.8 . . ?  
H19A C19 H19B 108.9 . . ?  
O1 C20 O2 107.75(14) . . ?  
O1 C20 C10 105.63(13) . . ?  
O2 C20 C10 116.98(13) . . ?  
O1 C20 H20 108.7 . . ?  
O2 C20 H20 108.7 . . ?  
C10 C20 H20 108.7 . . ?  
C2\_1 C1\_1 C10\_1 114.11(17) . . ?  
C2\_1 C1\_1 H1A\_1 108.7 . . ?  
C10\_1 C1\_1 H1A\_1 108.7 . . ?  
C2\_1 C1\_1 H1AB\_1 108.7 . . ?  
C10\_1 C1\_1 H1AB\_1 108.7 . . ?  
H1A\_1 C1\_1 H1AB\_1 107.6 . . ?  
C20\_1 O1\_1 C6\_1 109.18(14) . . ?  
C3\_1 C2\_1 C1\_1 111.77(17) . . ?  
C3\_1 C2\_1 H2A\_1 109.3 . . ?  
C1\_1 C2\_1 H2A\_1 109.3 . . ?  
C3\_1 C2\_1 H2AB\_1 109.3 . . ?  
C1\_1 C2\_1 H2AB\_1 109.3 . . ?

H2A\_1 C2\_1 H2AB\_1 107.9 .. ?  
C7\_1 O2\_1 C20\_1 124.23(13) .. ?  
C2\_1 C3\_1 C4\_1 113.73(17) .. ?  
C2\_1 C3\_1 H3A\_1 108.8 .. ?  
C4\_1 C3\_1 H3A\_1 108.8 .. ?  
C2\_1 C3\_1 H3AB\_1 108.8 .. ?  
C4\_1 C3\_1 H3AB\_1 108.8 .. ?  
H3A\_1 C3\_1 H3AB\_1 107.7 .. ?  
C3\_1 C4\_1 C19\_1 113.39(18) .. ?  
C3\_1 C4\_1 C18\_1 109.47(17) .. ?  
C19\_1 C4\_1 C18\_1 109.15(19) .. ?  
C3\_1 C4\_1 C5\_1 113.51(16) .. ?  
C19\_1 C4\_1 C5\_1 102.02(15) .. ?  
C18\_1 C4\_1 C5\_1 109.00(16) .. ?  
C15\_1 O4\_1 H4\_1 109.5 .. ?  
C4\_1 C5\_1 C6\_1 104.02(14) .. ?  
C4\_1 C5\_1 C10\_1 120.32(14) .. ?  
C6\_1 C5\_1 C10\_1 104.18(13) .. ?  
C4\_1 C5\_1 H5\_1 109.2 .. ?  
C6\_1 C5\_1 H5\_1 109.2 .. ?  
C10\_1 C5\_1 H5\_1 109.2 .. ?  
C6\_1 O5\_1 C19\_1 108.93(16) .. ?  
O5\_1 C6\_1 O1\_1 111.70(18) .. ?  
O5\_1 C6\_1 C5\_1 107.56(16) .. ?  
O1\_1 C6\_1 C5\_1 107.43(15) .. ?  
O5\_1 C6\_1 H6\_1 110.0 .. ?  
O1\_1 C6\_1 H6\_1 110.0 .. ?  
C5\_1 C6\_1 H6\_1 110.0 .. ?  
O3\_1 C7\_1 O2\_1 116.92(16) .. ?

O3\_1 C7\_1 C8\_1 123.70(19) . . ?  
O2\_1 C7\_1 C8\_1 119.14(15) . . ?  
C7\_1 C8\_1 C9\_1 113.75(14) . . ?  
C7\_1 C8\_1 C14\_1 108.36(14) . . ?  
C9\_1 C8\_1 C14\_1 113.48(13) . . ?  
C7\_1 C8\_1 C15\_1 110.71(13) . . ?  
C9\_1 C8\_1 C15\_1 110.11(13) . . ?  
C14\_1 C8\_1 C15\_1 99.53(15) . . ?  
C8\_1 C9\_1 C10\_1 114.89(12) . . ?  
C8\_1 C9\_1 C11\_1 111.21(13) . . ?  
C10\_1 C9\_1 C11\_1 114.49(13) . . ?  
C8\_1 C9\_1 H9\_1 105.0 . . ?  
C10\_1 C9\_1 H9\_1 105.0 . . ?  
C11\_1 C9\_1 H9\_1 105.0 . . ?  
C20\_1 C10\_1 C1\_1 110.81(14) . . ?  
C20\_1 C10\_1 C9\_1 108.02(13) . . ?  
C1\_1 C10\_1 C9\_1 115.21(14) . . ?  
C20\_1 C10\_1 C5\_1 101.12(13) . . ?  
C1\_1 C10\_1 C5\_1 114.11(14) . . ?  
C9\_1 C10\_1 C5\_1 106.49(12) . . ?  
C12\_1 C11\_1 C9\_1 116.10(15) . . ?  
C12\_1 C11\_1 H11A\_1 108.3 . . ?  
C9\_1 C11\_1 H11A\_1 108.3 . . ?  
C12\_1 C11\_1 H11B\_1 108.3 . . ?  
C9\_1 C11\_1 H11B\_1 108.3 . . ?  
H11A\_1 C11\_1 H11B\_1 107.4 . . ?  
C11\_1 C12\_1 C13\_1 111.10(15) . . ?  
C11\_1 C12\_1 H12A\_1 109.4 . . ?  
C13\_1 C12\_1 H12A\_1 109.4 . . ?

C11\_1 C12\_1 H12B\_1 109.4 . . ?  
C13\_1 C12\_1 H12B\_1 109.4 . . ?  
H12A\_1 C12\_1 H12B\_1 108.0 . . ?  
C16\_1 C13\_1 C14\_1 102.82(16) . . ?  
C16\_1 C13\_1 C12\_1 110.67(19) . . ?  
C14\_1 C13\_1 C12\_1 108.22(18) . . ?  
C16\_1 C13\_1 H13\_1 111.6 . . ?  
C14\_1 C13\_1 H13\_1 111.6 . . ?  
C12\_1 C13\_1 H13\_1 111.6 . . ?  
C13\_1 C14\_1 C8\_1 101.02(15) . . ?  
C13\_1 C14\_1 H14A\_1 111.6 . . ?  
C8\_1 C14\_1 H14A\_1 111.6 . . ?  
C13\_1 C14\_1 H14B\_1 111.6 . . ?  
C8\_1 C14\_1 H14B\_1 111.6 . . ?  
H14A\_1 C14\_1 H14B\_1 109.4 . . ?  
O4\_1 C15\_1 C16\_1 111.80(15) . . ?  
O4\_1 C15\_1 C8\_1 115.47(15) . . ?  
C16\_1 C15\_1 C8\_1 103.86(15) . . ?  
O4\_1 C15\_1 H15\_1 108.5 . . ?  
C16\_1 C15\_1 H15\_1 108.5 . . ?  
C8\_1 C15\_1 H15\_1 108.5 . . ?  
C17\_1 C16\_1 C13\_1 127.5(2) . . ?  
C17\_1 C16\_1 C15\_1 124.6(2) . . ?  
C13\_1 C16\_1 C15\_1 107.97(17) . . ?  
C16\_1 C17\_1 H17A\_1 120.0 . . ?  
C16\_1 C17\_1 H17B\_1 120.0 . . ?  
H17A\_1 C17\_1 H17B\_1 120.0 . . ?  
C4\_1 C18\_1 H18A\_1 109.5 . . ?  
C4\_1 C18\_1 H18B\_1 109.5 . . ?

H18A\_1 C18\_1 H18B\_1 109.5 .. ?  
C4\_1 C18\_1 H18C\_1 109.5 .. ?  
H18A\_1 C18\_1 H18C\_1 109.5 .. ?  
H18B\_1 C18\_1 H18C\_1 109.5 .. ?  
O5\_1 C19\_1 C4\_1 105.41(18) .. ?  
O5\_1 C19\_1 H19A\_1 110.7 .. ?  
C4\_1 C19\_1 H19A\_1 110.7 .. ?  
O5\_1 C19\_1 H19B\_1 110.7 .. ?  
C4\_1 C19\_1 H19B\_1 110.7 .. ?  
H19A\_1 C19\_1 H19B\_1 108.8 .. ?  
O1\_1 C20\_1 O2\_1 106.55(16) .. ?  
O1\_1 C20\_1 C10\_1 106.56(15) .. ?  
O2\_1 C20\_1 C10\_1 117.90(15) .. ?  
O1\_1 C20\_1 H20\_1 108.5 .. ?  
O2\_1 C20\_1 H20\_1 108.5 .. ?  
C10\_1 C20\_1 H20\_1 108.5 .. ?

\_refine\_diff\_density\_max 0.281  
\_refine\_diff\_density\_min -0.143  
\_refine\_diff\_density\_rms 0.035

\_shelx\_res\_file

;

TITL 20190801WYXIRX25\_0m\_a.res in P2(1)

20190801WYXIRX25\_0m\_a.res

created by SHELXL-2018/3 at 11:28:29 on 06-Feb-2022

REM Old TITL Integration of 20190801WYXIRX25

REM SHELXT solution in P2(1)

REM R1 0.133, Rweak 0.038, Alpha 0.007, Orientation as input

REM Flack x = 0.022 ( 0.123 ) from Parsons' quotients

REM Formula found by SHELXT: C39 O11

CELL 0.71076 6.4646 21.4751 12.3769 90.000 94.100 90.000

ZERR 4.000 0.0002 0.0008 0.0005 0.000 0.001 0.000

LATT -1

SYMM -X, 1/2+Y, -Z

SFAC C H O

UNIT 80 104 20

TEMP 26.870

ACTA

L.S. 10

BOND \$H

LIST 4

FMAP 2

PLAN 5

WGHT 0.064200 0.028500

FVAR 1.33315

O1 3 -0.037212 0.388166 0.235929 11.00000 0.06588 0.04843 =  
0.02499 0.00080 0.00819 -0.00410

C1 1 -0.175015 0.392555 -0.057790 11.00000 0.04423 0.04524 =  
0.03198 0.00020 -0.00836 0.00720

AFIX 23

H1A 2 -0.090981 0.386557 -0.118817 11.00000 -1.20000

H1AB 2 -0.285972 0.362070 -0.063575 11.00000 -1.20000

AFIX 0

O2 3 -0.273343 0.318733 0.160985 11.00000 0.04410 0.05185 =  
0.05683 -0.00159 0.02770 -0.00858

C2 1 -0.269137 0.457726 -0.064134 11.00000 0.06164 0.06179 =  
0.04129 0.00433 -0.01247 0.02708



|      |     |           |          |           |          |          |           |
|------|-----|-----------|----------|-----------|----------|----------|-----------|
| AFIX | 23  |           |          |           |          |          |           |
| H2A  | 2   | -0.350489 | 0.462602 | -0.132550 | 11.00000 | -1.20000 |           |
| H2AB | 2   | -0.361049 | 0.463054 | -0.006216 | 11.00000 | -1.20000 |           |
| AFIX | 0   |           |          |           |          |          |           |
| O3   | 3   | -0.301143 | 0.218732 | 0.150816  | 11.00000 | 0.04497  | 0.05467 = |
|      |     | 0.05660   | 0.01311  | 0.01298   | -0.01577 |          |           |
| C3   | 1   | -0.101731 | 0.506896 | -0.054625 | 11.00000 | 0.08544  | 0.04131 = |
|      |     | 0.03599   | 0.00852  | 0.00681   | 0.02190  |          |           |
| AFIX | 23  |           |          |           |          |          |           |
| H3A  | 2   | -0.166421 | 0.547642 | -0.059884 | 11.00000 | -1.20000 |           |
| H3AB | 2   | -0.015280 | 0.502590 | -0.115097 | 11.00000 | -1.20000 |           |
| AFIX | 0   |           |          |           |          |          |           |
| O4   | 3   | 0.253600  | 0.214978 | 0.173796  | 11.00000 | 0.04261  | 0.05755 = |
|      |     | 0.02874   | 0.00524  | -0.00248  | 0.00769  |          |           |
| AFIX | 148 |           |          |           |          |          |           |
| H4   | 2   | 0.368507  | 0.218597 | 0.154343  | 11.00000 | -1.50000 |           |
| AFIX | 0   |           |          |           |          |          |           |
| C4   | 1   | 0.035956  | 0.503492 | 0.050915  | 11.00000 | 0.05390  | 0.02821 = |
|      |     | 0.04008   | 0.00232  | 0.01073   | 0.00855  |          |           |
| O5   | 3   | 0.032427  | 0.494786 | 0.239757  | 11.00000 | 0.07295  | 0.04336 = |
|      |     | 0.03446   | -0.01011 | -0.00328  | 0.01384  |          |           |
| C5   | 1   | 0.102452  | 0.436195 | 0.083618  | 11.00000 | 0.03444  | 0.02694 = |
|      |     | 0.03144   | 0.00008  | 0.00434   | 0.00175  |          |           |
| AFIX | 13  |           |          |           |          |          |           |
| H5   | 2   | 0.243347  | 0.428261 | 0.062575  | 11.00000 | -1.20000 |           |
| AFIX | 0   |           |          |           |          |          |           |
| C6   | 1   | 0.100620  | 0.435546 | 0.208522  | 11.00000 | 0.04745  | 0.03534 = |
|      |     | 0.03110   | -0.00519 | -0.00324  | 0.00450  |          |           |
| AFIX | 13  |           |          |           |          |          |           |

|      |    |           |          |           |          |          |           |
|------|----|-----------|----------|-----------|----------|----------|-----------|
| H6   | 2  | 0.240154  | 0.427226 | 0.241601  | 11.00000 | -1.20000 |           |
| AFIX | 0  |           |          |           |          |          |           |
| C7   | 1  | -0.205983 | 0.264040 | 0.125661  | 11.00000 | 0.02992  | 0.04503 = |
|      |    | 0.03082   | 0.00737  | 0.00214   | -0.00819 |          |           |
| C8   | 1  | -0.030596 | 0.260948 | 0.051233  | 11.00000 | 0.02819  | 0.03201 = |
|      |    | 0.02558   | 0.00330  | 0.00116   | -0.00531 |          |           |
| C9   | 1  | 0.094637  | 0.321604 | 0.047066  | 11.00000 | 0.02475  | 0.02818 = |
|      |    | 0.02172   | 0.00202  | 0.00210   | -0.00250 |          |           |
| AFIX | 13 |           |          |           |          |          |           |
| H9   | 2  | 0.180382  | 0.322867 | 0.115607  | 11.00000 | -1.20000 |           |
| AFIX | 0  |           |          |           |          |          |           |
| C10  | 1  | -0.040906 | 0.381084 | 0.047209  | 11.00000 | 0.02795  | 0.03137 = |
|      |    | 0.02375   | 0.00228  | 0.00305   | 0.00035  |          |           |
| C12  | 1  | 0.189658  | 0.280239 | -0.143458 | 11.00000 | 0.05137  | 0.03884 = |
|      |    | 0.02749   | 0.00101  | 0.01103   | 0.00085  |          |           |
| AFIX | 23 |           |          |           |          |          |           |
| H12A | 2  | 0.097553  | 0.304162 | -0.192905 | 11.00000 | -1.20000 |           |
| H12B | 2  | 0.312983  | 0.270231 | -0.180236 | 11.00000 | -1.20000 |           |
| AFIX | 0  |           |          |           |          |          |           |
| C11  | 1  | 0.250702  | 0.319660 | -0.042192 | 11.00000 | 0.03392  | 0.03207 = |
|      |    | 0.03317   | -0.00001 | 0.01137   | -0.00411 |          |           |
| AFIX | 23 |           |          |           |          |          |           |
| H11A | 2  | 0.274063  | 0.362048 | -0.065503 | 11.00000 | -1.20000 |           |
| H11B | 2  | 0.381726  | 0.304038 | -0.009951 | 11.00000 | -1.20000 |           |
| AFIX | 0  |           |          |           |          |          |           |
| C13  | 1  | 0.081844  | 0.220077 | -0.113237 | 11.00000 | 0.05058  | 0.03531 = |
|      |    | 0.02760   | -0.00489 | -0.00087  | -0.00310 |          |           |
| AFIX | 13 |           |          |           |          |          |           |
| H13  | 2  | 0.054951  | 0.192676 | -0.175989 | 11.00000 | -1.20000 |           |

|      |     |           |          |           |          |          |           |
|------|-----|-----------|----------|-----------|----------|----------|-----------|
| AFIX | 0   |           |          |           |          |          |           |
| C14  | 1   | -0.117977 | 0.237521 | -0.061430 | 11.00000 | 0.03959  | 0.03706 = |
|      |     | 0.03170   | -0.00003 | -0.00608  | -0.00818 |          |           |
| AFIX | 23  |           |          |           |          |          |           |
| H14A | 2   | -0.207779 | 0.201707 | -0.055198 | 11.00000 | -1.20000 |           |
| H14B | 2   | -0.193201 | 0.270067 | -0.101886 | 11.00000 | -1.20000 |           |
| AFIX | 0   |           |          |           |          |          |           |
| C15  | 1   | 0.113840  | 0.204584 | 0.083360  | 11.00000 | 0.03765  | 0.03090 = |
|      |     | 0.03184   | 0.00574  | 0.00096   | -0.00387 |          |           |
| AFIX | 13  |           |          |           |          |          |           |
| H15  | 2   | 0.024119  | 0.169921 | 0.101626  | 11.00000 | -1.20000 |           |
| AFIX | 0   |           |          |           |          |          |           |
| C16  | 1   | 0.207195  | 0.187675 | -0.021712 | 11.00000 | 0.04261  | 0.02899 = |
|      |     | 0.03387   | -0.00204 | -0.00011  | -0.00430 |          |           |
| C17  | 1   | 0.372571  | 0.152535 | -0.030228 | 11.00000 | 0.04989  | 0.03952 = |
|      |     | 0.04672   | -0.00673 | 0.00224   | 0.00190  |          |           |
| AFIX | 93  |           |          |           |          |          |           |
| H17A | 2   | 0.422869  | 0.145669 | -0.097758 | 11.00000 | -1.20000 |           |
| H17B | 2   | 0.438881  | 0.134623 | 0.031296  | 11.00000 | -1.20000 |           |
| AFIX | 0   |           |          |           |          |          |           |
| C18  | 1   | 0.230321  | 0.543361 | 0.043365  | 11.00000 | 0.07192  | 0.03012 = |
|      |     | 0.08927   | 0.00473  | 0.02578   | -0.00193 |          |           |
| AFIX | 137 |           |          |           |          |          |           |
| H18A | 2   | 0.309812  | 0.527670 | -0.013332 | 11.00000 | -1.50000 |           |
| H18B | 2   | 0.312569  | 0.541789 | 0.111033  | 11.00000 | -1.50000 |           |
| H18C | 2   | 0.190630  | 0.585658 | 0.027653  | 11.00000 | -1.50000 |           |
| AFIX | 0   |           |          |           |          |          |           |
| C19  | 1   | -0.076113 | 0.524682 | 0.149362  | 11.00000 | 0.06006  | 0.03968 = |
|      |     | 0.03875   | -0.00355 | 0.00473   | 0.01590  |          |           |

|      |    |           |          |          |          |          |           |
|------|----|-----------|----------|----------|----------|----------|-----------|
| AFIX | 23 |           |          |          |          |          |           |
| H19A | 2  | -0.069790 | 0.569606 | 0.157061 | 11.00000 | -1.20000 |           |
| H19B | 2  | -0.220381 | 0.511907 | 0.142672 | 11.00000 | -1.20000 |           |
| AFIX | 0  |           |          |          |          |          |           |
| C20  | 1  | -0.173300 | 0.376572 | 0.144555 | 11.00000 | 0.03818  | 0.04115 = |
|      |    | 0.03600   | 0.00054  | 0.01322  | 0.00116  |          |           |
| AFIX | 13 |           |          |          |          |          |           |
| H20  | 2  | -0.278376 | 0.409527 | 0.138831 | 11.00000 | -1.20000 |           |
| AFIX | 0  |           |          |          |          |          |           |
| RESI | 1  |           |          |          |          |          |           |
| C1   | 1  | 0.700096  | 0.684416 | 0.554960 | 11.00000 | 0.03701  | 0.05834 = |
|      |    | 0.04293   | -0.00331 | -0.00280 | 0.00195  |          |           |
| AFIX | 23 |           |          |          |          |          |           |
| H1A  | 2  | 0.668846  | 0.676647 | 0.629261 | 11.00000 | -1.20000 |           |
| H1AB | 2  | 0.795605  | 0.652342 | 0.534666 | 11.00000 | -1.20000 |           |
| AFIX | 0  |           |          |          |          |          |           |
| O1   | 3  | 0.370810  | 0.693792 | 0.300227 | 11.00000 | 0.08127  | 0.06164 = |
|      |    | 0.02695   | -0.00501 | -0.00379 | 0.00968  |          |           |
| C2   | 1  | 0.806612  | 0.747382 | 0.549448 | 11.00000 | 0.03959  | 0.07003 = |
|      |    | 0.05998   | -0.00738 | -0.00173 | -0.01176 |          |           |
| AFIX | 23 |           |          |          |          |          |           |
| H2A  | 2  | 0.927276  | 0.748086 | 0.600740 | 11.00000 | -1.20000 |           |
| H2AB | 2  | 0.853788  | 0.753261 | 0.477494 | 11.00000 | -1.20000 |           |
| AFIX | 0  |           |          |          |          |          |           |
| O2   | 3  | 0.585064  | 0.610576 | 0.324616 | 11.00000 | 0.07438  | 0.05738 = |
|      |    | 0.03865   | -0.00837 | 0.02631  | 0.00593  |          |           |
| C3   | 1  | 0.663453  | 0.800040 | 0.574605 | 11.00000 | 0.05936  | 0.05852 = |
|      |    | 0.04597   | -0.01102 | 0.00494  | -0.01635 |          |           |
| AFIX | 23 |           |          |          |          |          |           |

|      |     |          |          |          |          |          |           |
|------|-----|----------|----------|----------|----------|----------|-----------|
| H3A  | 2   | 0.737833 | 0.839080 | 0.570172 | 11.00000 | -1.20000 |           |
| H3AB | 2   | 0.624623 | 0.795456 | 0.648452 | 11.00000 | -1.20000 |           |
| AFIX | 0   |          |          |          |          |          |           |
| O3   | 3   | 0.522306 | 0.511195 | 0.314874 | 11.00000 | 0.06257  | 0.06372 = |
|      |     | 0.05434  | -0.02599 | 0.02019  | 0.00154  |          |           |
| C4   | 1   | 0.466624 | 0.803119 | 0.498855 | 11.00000 | 0.05440  | 0.04289 = |
|      |     | 0.03454  | -0.00228 | 0.01173  | -0.00625 |          |           |
| O4   | 3   | 0.043128 | 0.534717 | 0.451166 | 11.00000 | 0.04185  | 0.06566 = |
|      |     | 0.03923  | -0.01333 | 0.00095  | -0.00036 |          |           |
| AFIX | 147 |          |          |          |          |          |           |
| H4   | 2   | 0.012091 | 0.523513 | 0.388769 | 11.00000 | -1.50000 |           |
| AFIX | 0   |          |          |          |          |          |           |
| C5   | 1   | 0.364852 | 0.738968 | 0.476100 | 11.00000 | 0.03833  | 0.04008 = |
|      |     | 0.02771  | 0.00013  | 0.00381  | 0.00090  |          |           |
| AFIX | 13  |          |          |          |          |          |           |
| H5   | 2   | 0.248497 | 0.733842 | 0.521912 | 11.00000 | -1.20000 |           |
| AFIX | 0   |          |          |          |          |          |           |
| O5   | 3   | 0.337095 | 0.801334 | 0.316435 | 11.00000 | 0.10239  | 0.05339 = |
|      |     | 0.04213  | 0.01337  | -0.00683 | -0.00294 |          |           |
| C6   | 1   | 0.280542 | 0.742929 | 0.356064 | 11.00000 | 0.05797  | 0.04936 = |
|      |     | 0.03441  | 0.00409  | -0.00500 | 0.00297  |          |           |
| AFIX | 13  |          |          |          |          |          |           |
| H6   | 2   | 0.129218 | 0.738681 | 0.350595 | 11.00000 | -1.20000 |           |
| AFIX | 0   |          |          |          |          |          |           |
| C7   | 1   | 0.506634 | 0.557948 | 0.366002 | 11.00000 | 0.03740  | 0.05592 = |
|      |     | 0.03402  | -0.01234 | 0.00559  | 0.00647  |          |           |
| C8   | 1   | 0.422908 | 0.560010 | 0.476952 | 11.00000 | 0.03697  | 0.04135 = |
|      |     | 0.02777  | -0.00614 | 0.00102  | 0.00689  |          |           |
| C9   | 1   | 0.352602 | 0.625139 | 0.510320 | 11.00000 | 0.03565  | 0.03946 = |

|      |    |  |          |          |          |          |          |           |
|------|----|--|----------|----------|----------|----------|----------|-----------|
|      |    |  | 0.02200  | -0.00343 | 0.00340  | 0.00445  |          |           |
| AFIX | 13 |  |          |          |          |          |          |           |
| H9   | 2  |  | 0.223002 | 0.632712 | 0.466263 | 11.00000 | -1.20000 |           |
| AFIX | 0  |  |          |          |          |          |          |           |
| C10  | 1  |  | 0.498508 | 0.678943 | 0.481640 | 11.00000 | 0.03532  | 0.04382 = |
|      |    |  | 0.02288  | -0.00352 | 0.00404  | 0.00229  |          |           |
| C11  | 1  |  | 0.290878 | 0.625602 | 0.629269 | 11.00000 | 0.05943  | 0.04241 = |
|      |    |  | 0.02612  | -0.00375 | 0.01104  | 0.00225  |          |           |
| AFIX | 23 |  |          |          |          |          |          |           |
| H11A | 2  |  | 0.304470 | 0.667851 | 0.656576 | 11.00000 | -1.20000 |           |
| H11B | 2  |  | 0.145668 | 0.614233 | 0.629322 | 11.00000 | -1.20000 |           |
| AFIX | 0  |  |          |          |          |          |          |           |
| C12  | 1  |  | 0.415740 | 0.582477 | 0.708003 | 11.00000 | 0.08334  | 0.05367 = |
|      |    |  | 0.02571  | 0.00048  | -0.00300 | -0.00159 |          |           |
| AFIX | 23 |  |          |          |          |          |          |           |
| H12A | 2  |  | 0.340347 | 0.576144 | 0.772110 | 11.00000 | -1.20000 |           |
| H12B | 2  |  | 0.547357 | 0.601920 | 0.730306 | 11.00000 | -1.20000 |           |
| AFIX | 0  |  |          |          |          |          |          |           |
| C13  | 1  |  | 0.455201 | 0.519317 | 0.655289 | 11.00000 | 0.07647  | 0.04901 = |
|      |    |  | 0.03696  | 0.00577  | -0.01138 | 0.00834  |          |           |
| AFIX | 13 |  |          |          |          |          |          |           |
| H13  | 2  |  | 0.522711 | 0.490025 | 0.707300 | 11.00000 | -1.20000 |           |
| AFIX | 0  |  |          |          |          |          |          |           |
| C14  | 1  |  | 0.585293 | 0.530330 | 0.559128 | 11.00000 | 0.05110  | 0.04783 = |
|      |    |  | 0.04755  | -0.00248 | -0.00914 | 0.01446  |          |           |
| AFIX | 23 |  |          |          |          |          |          |           |
| H14A | 2  |  | 0.638753 | 0.491596 | 0.531977 | 11.00000 | -1.20000 |           |
| H14B | 2  |  | 0.699696 | 0.558510 | 0.577517 | 11.00000 | -1.20000 |           |
| AFIX | 0  |  |          |          |          |          |          |           |

|      |     |           |          |          |          |          |           |
|------|-----|-----------|----------|----------|----------|----------|-----------|
| C15  | 1   | 0.242132  | 0.512307 | 0.484583 | 11.00000 | 0.04823  | 0.04135 = |
|      |     | 0.03241   | -0.00909 | 0.00424  | 0.00203  |          |           |
| AFIX | 13  |           |          |          |          |          |           |
| H15  | 2   | 0.271123  | 0.475826 | 0.440559 | 11.00000 | -1.20000 |           |
| AFIX | 0   |           |          |          |          |          |           |
| C16  | 1   | 0.257372  | 0.493062 | 0.602956 | 11.00000 | 0.07001  | 0.03897 = |
|      |     | 0.03895   | -0.00100 | 0.00645  | 0.00449  |          |           |
| C17  | 1   | 0.117354  | 0.459132 | 0.649155 | 11.00000 | 0.08958  | 0.05754 = |
|      |     | 0.05689   | 0.00536  | 0.01800  | -0.00348 |          |           |
| AFIX | 93  |           |          |          |          |          |           |
| H17A | 2   | 0.136544  | 0.449129 | 0.722293 | 11.00000 | -1.20000 |           |
| H17B | 2   | -0.000236 | 0.445289 | 0.608484 | 11.00000 | -1.20000 |           |
| AFIX | 0   |           |          |          |          |          |           |
| C18  | 1   | 0.309185  | 0.846309 | 0.547398 | 11.00000 | 0.07843  | 0.03962 = |
|      |     | 0.05816   | -0.00437 | 0.02034  | 0.00306  |          |           |
| AFIX | 137 |           |          |          |          |          |           |
| H18A | 2   | 0.371423  | 0.886321 | 0.561767 | 11.00000 | -1.50000 |           |
| H18B | 2   | 0.267351  | 0.828738 | 0.613745 | 11.00000 | -1.50000 |           |
| H18C | 2   | 0.190073  | 0.850948 | 0.497117 | 11.00000 | -1.50000 |           |
| AFIX | 0   |           |          |          |          |          |           |
| C19  | 1   | 0.505123  | 0.825551 | 0.384834 | 11.00000 | 0.08410  | 0.05259 = |
|      |     | 0.04106   | 0.00357  | 0.01539  | -0.01471 |          |           |
| AFIX | 23  |           |          |          |          |          |           |
| H19A | 2   | 0.506970  | 0.870682 | 0.381894 | 11.00000 | -1.20000 |           |
| H19B | 2   | 0.636539  | 0.809921 | 0.362920 | 11.00000 | -1.20000 |           |
| AFIX | 0   |           |          |          |          |          |           |
| C20  | 1   | 0.545876  | 0.671537 | 0.362833 | 11.00000 | 0.05416  | 0.05071 = |
|      |     | 0.02995   | -0.00213 | 0.01190  | 0.00028  |          |           |
| AFIX | 13  |           |          |          |          |          |           |

H2O 2 0.664683 0.698035 0.349252 11.00000 -1.20000

RESI 0

AFIX 0

HKLF 4

REM 20190801WYXIRX25\_0m\_a.res in P2(1)

REM wR2 = 0.124171, GooF = S = 1.01847, Restrained GooF = 1.01844 for all data

REM R1 = 0.046581 for 11735 Fo > 4sig(Fo) and 0.081328 for all 17341 data

REM 456 parameters refined using 1 restraints
